# Supplementary material for: Strong supramolecular synthons assembled by hydrogen bonds and chalcogen bonds
Source: Royal Society of Chemistry journal article supplement (doi:10.1039/d5ce00262a), 2025-01-01

Electronic Supplementary Material (ESI) for CrystEngComm.  
This journal is © The Royal Society of Chemistry 2025

## **Electronic Supplementary Information**

### **Strong supramolecular synthons assembled by hydrogen bonds and chalcogen bonds**

Yu Zhang, Xiaotian Sun and Weizhou Wang\*

College of Chemistry and Chemical Engineering, Luoyang Normal University, Luoyang 471934, P.  
R. China  
E-mail: wzw@lynu.edu.cn

## **Contents**

### S1. Methods

#### S1.1. Cocrystal synthesis

#### S1.2. Single-crystal X-ray diffraction

#### S1.3. Computational details

### S2. Supplementary results

### S3. References

### S4. The CheckCIF reports for the six cocrystals

## **S1. Methods**

### **S1.1. Cocrystal synthesis**

The 5-nitroisophthalic acid (purity:  $\geq 98\%$ ), 5-bromoisophthalic acid (purity:  $\geq 98\%$ ), 5-methylisophthalic acid (purity:  $\geq 98\%$ ), 5-aminoisophthalic acid (purity:  $\geq 98\%$ ), 4-bromoisophthalic acid (purity:  $\geq 98\%$ ), 2,5-thiophenedicarboxylic acid (purity:  $\geq 98\%$ ) and 2,1,3-benzoselenadiazole (purity:  $\geq 98\%$ ) were purchased from Alfa Chemical Co., Ltd., Zhengzhou, China. The solvents ethanol (analytical reagent grade) were purchased from local suppliers. All reagents and solvents were used without further purification. The synthetic procedure of each cocrystal is almost the same. Using 20 mL ethanol as solvent, we prepared the solutions of binary mixtures of 2,1,3-benzoselenadiazole (0.2 mmol, 0.0366 g) with 5-nitroisophthalic acid (0.2 mmol, 0.0422 g), 5-bromoisophthalic acid (0.2 mmol, 0.0490 g), 5-methylisophthalic acid (0.2 mmol, 0.0360 g), 5-aminoisophthalic acid (0.2 mmol, 0.0362 g), 4-bromoisophthalic acid (0.2 mmol, 0.0490 g) and 2,5-thiophenedicarboxylic acid (0.2 mmol, 0.0344 g), respectively, by gently stirring in the air at room temperature. After 7-8 days, single crystals of six cocrystals suitable for single-crystal X-ray diffraction analyses were successfully synthesized by slowly evaporating these solutions also in the air and at room temperature.

### **S1.2. Single-crystal X-ray diffraction**

Single-crystal X-ray diffraction data were collected on the Bruker D8 or Oxford Diffraction SuperNova area-detector diffractometer equipped with the Mo-K $\alpha$  X-ray source ( $\lambda = 0.71073 \text{ \AA}$ ). The data reduction was performed using CrysAlisPro software.<sup>1,2</sup> The crystal structure was solved and refined with the SHELXS-97/SHELXS-2014 program.<sup>3-5</sup> Anisotropic thermal parameters were assigned to all non-hydrogen atoms. The hydrogen atoms were set in calculated positions and refined as riding atoms with a common fixed isotropic thermal parameter. Crystallographic data of the six cocrystals were listed in the next section. The CIF files of the thirteen cocrystals (CCDC deposition numbers: 2429784-2429789) can be obtained free of charge via <http://www.ccdc.cam.ac.uk/conts/retrieving.html>. At the same time, the CIF files of the six cocrystals were also provided as the electronic supplementary materials. The

checkcif files for the six cocrystal structures can be found in the Supplementary Materials.

### **S1.3. Computational details**

The geometries of the complexes were not optimized, and taken from the corresponding crystal structures. All the density functional theory (DFT) calculations were carried out at the PBE0-D3(BJ)/def2-TZVPP level of theory with the Gaussian 09 program.<sup>6-10</sup> Previous studies on the noncovalent interactions have shown that the PBE0-D3(BJ)/def2-TZVPP calculations can give comparable results with the “golden standard” coupled cluster calculations.<sup>11,12</sup> It is well known that the accuracy of the DFT calculations also depends on the number of points used in the numerical integration. An “ultrafine” integration grid (99 radial, 590 angular points) was used for all the DFT calculations to avoid the possible integration grid errors. All the interaction energies have been corrected for basis set superposition error by using the counterpoise scheme of Boys and Bernardi.<sup>13</sup> In this study, the interaction energy refers to the sum of the interaction energy of an O–H...N hydrogen bond and the corresponding N–Se...O chalcogen bond. This combined value represents the strength of the supramolecular synthon, making it unnecessary to separately calculate the interaction energies of the O–H...N hydrogen bond and the N–Se...O chalcogen bond.

To further confirm the existence of the synthons, the “atoms in molecules” (AIM) analysis has been performed with the PBE0-D3(BJ)/def2-TZVPP electron density.<sup>14</sup> The AIM2000 software was employed to carry out the AIM analysis.<sup>15</sup>

## S2. Supplementary Results

**Table S1** The crystallographic data and structure refinement parameters for [IPA-5-NO<sub>2</sub>][BSeD], [IPA-5-Br][BSeD], [IPA-5-CH<sub>3</sub>][BSeD] and [IPA-5-NH<sub>2</sub>][BSeD].

| Cocrystal                                                                            | [IPA-5-NO <sub>2</sub> ][BSeD]                                  | [IPA-5-Br][BSeD]                                                  |
|--------------------------------------------------------------------------------------|-----------------------------------------------------------------|-------------------------------------------------------------------|
| CCDC No.                                                                             | 2429784                                                         | 2429785                                                           |
| Empirical formula                                                                    | C <sub>14</sub> H <sub>9</sub> N <sub>3</sub> O <sub>6</sub> Se | C <sub>14</sub> H <sub>9</sub> BrN <sub>2</sub> O <sub>4</sub> Se |
| Formula weight                                                                       | 394.203                                                         | 428.10                                                            |
| Crystal size/mm <sup>3</sup>                                                         | 0.3 × 0.25 × 0.18                                               | 0.16 × 0.15 × 0.13                                                |
| Crystal system                                                                       | monoclinic                                                      | monoclinic                                                        |
| Space group                                                                          | <i>P</i> 2/ <i>c</i>                                            | <i>P</i> 2/ <i>c</i>                                              |
| <i>a</i> /Å                                                                          | 11.3555(4)                                                      | 11.154(3)                                                         |
| <i>b</i> /Å                                                                          | 9.1502(3)                                                       | 9.184(2)                                                          |
| <i>c</i> /Å                                                                          | 7.1692(4)                                                       | 7.3865(19)                                                        |
| $\alpha$ /°                                                                          | 90                                                              | 90                                                                |
| $\beta$ /°                                                                           | 99.648(5)                                                       | 99.177(9)                                                         |
| $\gamma$ /°                                                                          | 90                                                              | 90                                                                |
| <i>V</i> /Å <sup>3</sup>                                                             | 734.38(6)                                                       | 746.9(3)                                                          |
| <i>Z</i>                                                                             | 2                                                               | 2                                                                 |
| $\rho_{\text{calc}}/\text{g}\cdot\text{cm}^{-3}$                                     | 1.783                                                           | 1.903                                                             |
| <i>T</i> /K                                                                          | 293(2)                                                          | 300(2)                                                            |
| 2 $\theta$ range for data collection/°                                               | 7.28–58.4                                                       | 5.776–55.656                                                      |
| Reflections collected                                                                | 7626                                                            | 15360                                                             |
| Independent reflections [ <i>R</i> <sub>int</sub> ]                                  | 1733 [0.0377]                                                   | 1758 [0.1080]                                                     |
| <i>R</i> <sub>1</sub> , <i>wR</i> <sub>2</sub> ( <i>I</i> > 2 $\sigma$ ( <i>I</i> )) | 0.0384, 0.0772                                                  | 0.0515, 0.1006                                                    |
| <i>R</i> <sub>1</sub> , <i>wR</i> <sub>2</sub> (all data)                            | 0.0504, 0.0829                                                  | 0.0860, 0.1144                                                    |
| Goodness-of-fit on <i>F</i> <sup>2</sup>                                             | 1.076                                                           | 1.027                                                             |

| Cocrystal                                                                            | [IPA-5-CH <sub>3</sub> ][BSeD]                                   | [IPA-5-NH <sub>2</sub> ][BSeD]                                   |
|--------------------------------------------------------------------------------------|------------------------------------------------------------------|------------------------------------------------------------------|
| CCDC No.                                                                             | 2429786                                                          | 2429787                                                          |
| Empirical formula                                                                    | C <sub>15</sub> H <sub>12</sub> N <sub>2</sub> O <sub>4</sub> Se | C <sub>14</sub> H <sub>11</sub> N <sub>3</sub> O <sub>4</sub> Se |
| Formula weight                                                                       | 363.233                                                          | 364.22                                                           |
| Crystal size/mm <sup>3</sup>                                                         | 0.26 × 0.25 × 0.20                                               | 0.09 × 0.08 × 0.07                                               |
| Crystal system                                                                       | monoclinic                                                       | monoclinic                                                       |
| Space group                                                                          | <i>P</i> 2 <sub>1</sub> /m                                       | <i>P</i> 2 <sub>1</sub> /m                                       |
| <i>a</i> /Å                                                                          | 7.4596(4)                                                        | 6.8417(7)                                                        |
| <i>b</i> /Å                                                                          | 12.3445(6)                                                       | 12.3348(11)                                                      |
| <i>c</i> /Å                                                                          | 8.6525(4)                                                        | 8.5209(7)                                                        |
| $\alpha$ /°                                                                          | 90                                                               | 90                                                               |
| $\beta$ /°                                                                           | 112.155(6)                                                       | 102.207(4)                                                       |
| $\gamma$ /°                                                                          | 90                                                               | 90                                                               |
| <i>V</i> /Å <sup>3</sup>                                                             | 737.94(7)                                                        | 702.83(11)                                                       |
| <i>Z</i>                                                                             | 2                                                                | 2                                                                |
| $\rho_{\text{calc}}/\text{g}\cdot\text{cm}^{-3}$                                     | 1.635                                                            | 1.721                                                            |
| <i>T</i> /K                                                                          | 293(2)                                                           | 300(2)                                                           |
| 2 $\theta$ range for data collection/°                                               | 6.76–58.54                                                       | 13.24–145.57                                                     |
| Reflections collected                                                                | 7916                                                             | 1459                                                             |
| Independent reflections [ <i>R</i> <sub>int</sub> ]                                  | 1873 [0.0301]                                                    | 1459 [0.0655]                                                    |
| <i>R</i> <sub>1</sub> , <i>wR</i> <sub>2</sub> ( <i>I</i> > 2 $\sigma$ ( <i>I</i> )) | 0.0346, 0.0669                                                   | 0.0821, 0.2303                                                   |
| <i>R</i> <sub>1</sub> , <i>wR</i> <sub>2</sub> (all data)                            | 0.0451, 0.0702                                                   | 0.0897, 0.2443                                                   |
| Goodness-of-fit on <i>F</i> <sup>2</sup>                                             | 1.042                                                            | 1.086                                                            |

**Table S2** The crystallographic data and structure refinement parameters for [IPA-4-Br]<sub>2</sub>[BSeD] and [TDCA][BSeD].

| Cocrystal                                                                            | [IPA-4-Br] <sub>2</sub> [BSeD]                                     | [TDCA][BSeD]                                                     |
|--------------------------------------------------------------------------------------|--------------------------------------------------------------------|------------------------------------------------------------------|
| CCDC No.                                                                             | 2429788                                                            | 2429789                                                          |
| Empirical formula                                                                    | C <sub>11</sub> H <sub>6</sub> BrNO <sub>4</sub> Se <sub>0.5</sub> | C <sub>12</sub> H <sub>8</sub> N <sub>2</sub> O <sub>4</sub> SSe |
| Formula weight                                                                       | 335.56                                                             | 355.22                                                           |
| Crystal size/mm <sup>3</sup>                                                         | 0.30 × 0.21 × 0.17                                                 | 0.18 × 0.15 × 0.13                                               |
| Crystal system                                                                       | monoclinic                                                         | monoclinic                                                       |
| Space group                                                                          | <i>P</i> 2 <sub>1</sub> /m                                         | <i>P</i> 2 <sub>1</sub> /c                                       |
| <i>a</i> /Å                                                                          | 3.89920(10)                                                        | 3.8144(11)                                                       |
| <i>b</i> /Å                                                                          | 37.6399(13)                                                        | 22.357(7)                                                        |
| <i>c</i> /Å                                                                          | 7.7471(2)                                                          | 15.964(5)                                                        |
| $\alpha$ /°                                                                          | 90                                                                 | 90                                                               |
| $\beta$ /°                                                                           | 95.702(3)                                                          | 93.581(9)                                                        |
| $\gamma$ /°                                                                          | 90                                                                 | 90                                                               |
| <i>V</i> /Å <sup>3</sup>                                                             | 1131.38(6)                                                         | 1358.7(7)                                                        |
| <i>Z</i>                                                                             | 4                                                                  | 4                                                                |
| $\rho_{\text{calc}}$ /g·cm <sup>-3</sup>                                             | 1.970                                                              | 1.737                                                            |
| <i>T</i> /K                                                                          | 293(2)                                                             | 300(2)                                                           |
| 2 $\theta$ range for data collection/°                                               | 6.832–58.26                                                        | 5.114–54.97                                                      |
| Reflections collected                                                                | 14800                                                              | 25654                                                            |
| Independent reflections [ <i>R</i> <sub>int</sub> ]                                  | 2827 [0.0389]                                                      | 3070 [0.0641]                                                    |
| <i>R</i> <sub>1</sub> , <i>wR</i> <sub>2</sub> ( <i>I</i> > 2 $\sigma$ ( <i>I</i> )) | 0.0468, 0.0946                                                     | 0.0441, 0.0738                                                   |
| <i>R</i> <sub>1</sub> , <i>wR</i> <sub>2</sub> (all data)                            | 0.0702, 0.1024                                                     | 0.0648, 0.0791                                                   |
| Goodness-of-fit on <i>F</i> <sup>2</sup>                                             | 1.059                                                              | 1.106                                                            |

[IPA-5-NO<sub>2</sub>][BSeD]

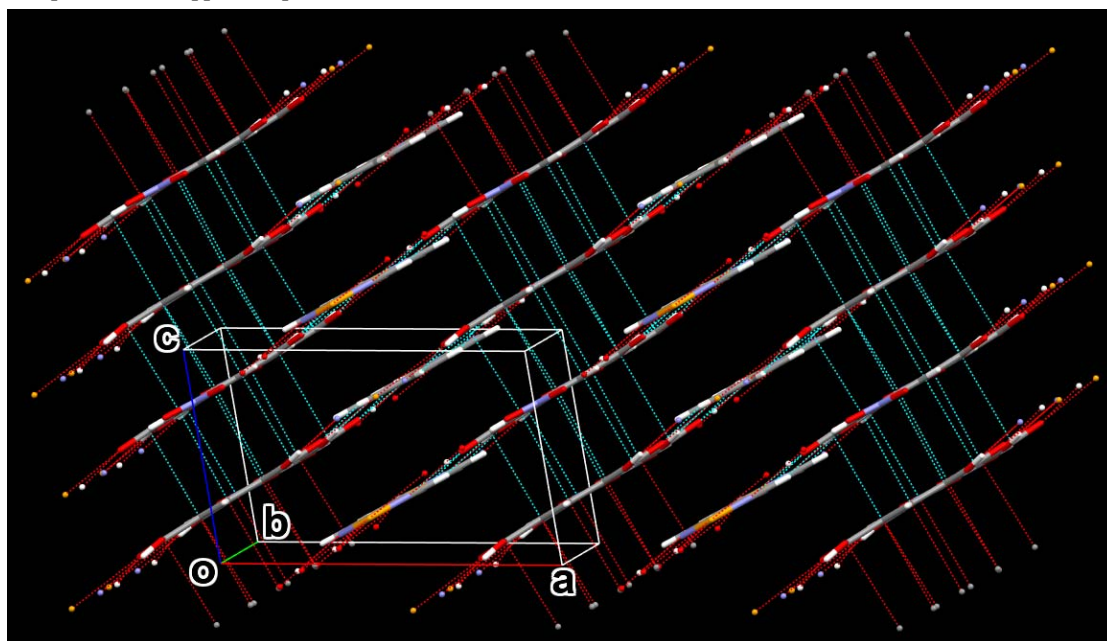

[IPA-5-Br][BSeD]

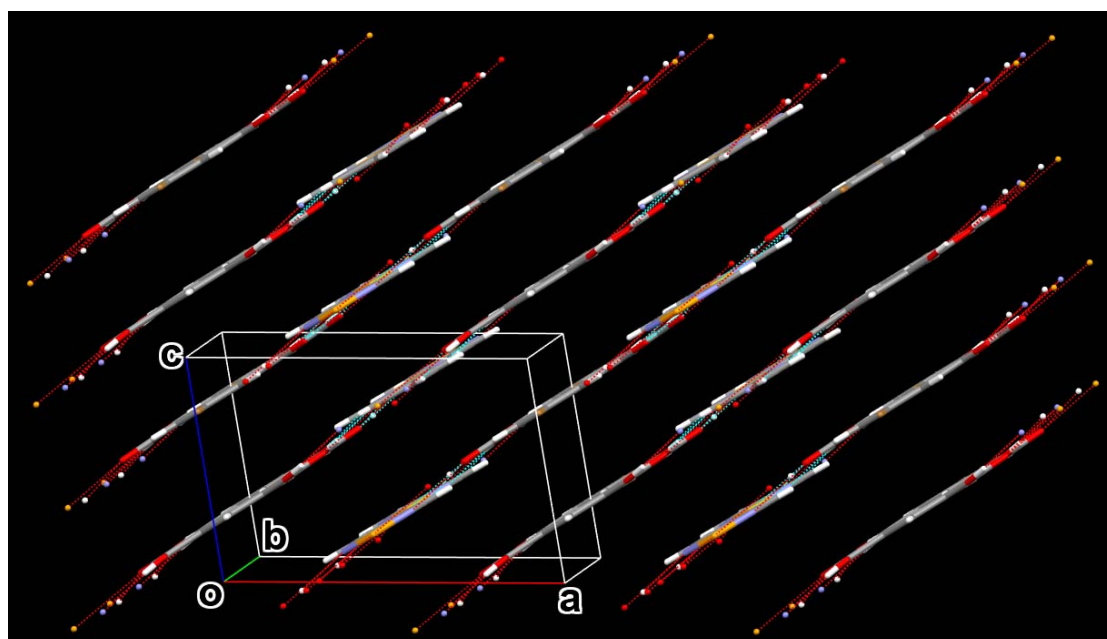



[IPA-5-CH<sub>3</sub>][BSeD]

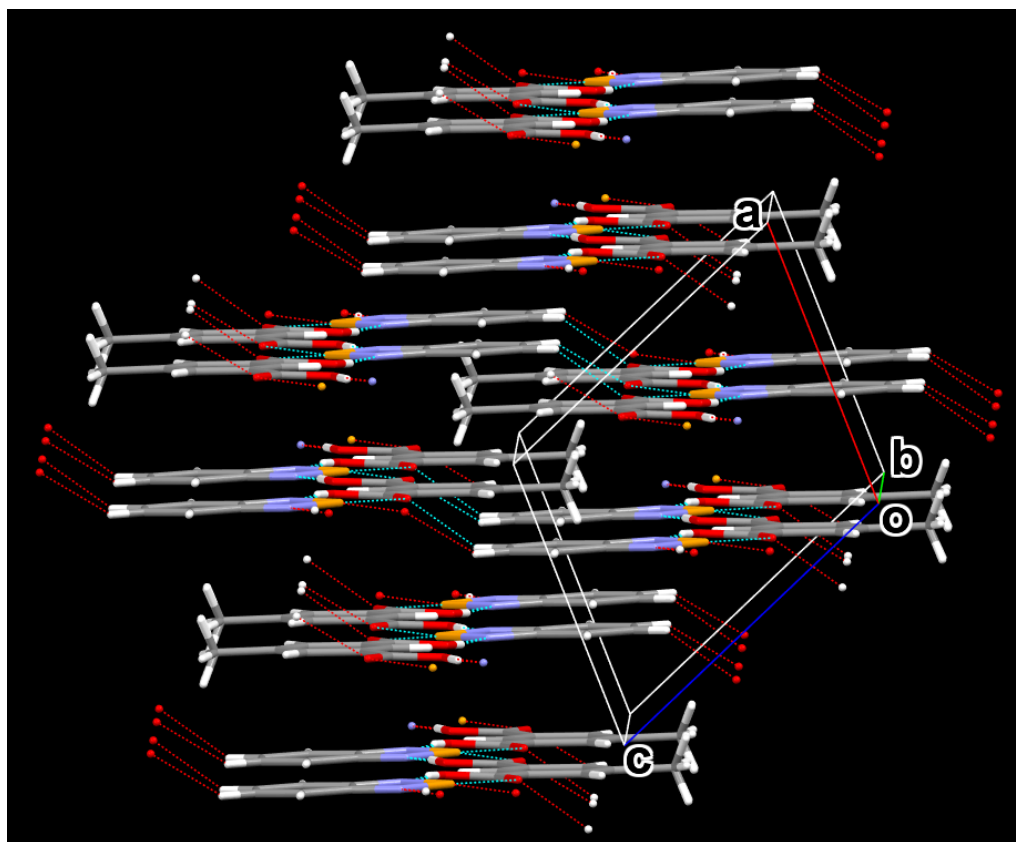

[IPA-5-NH<sub>2</sub>][BSeD]

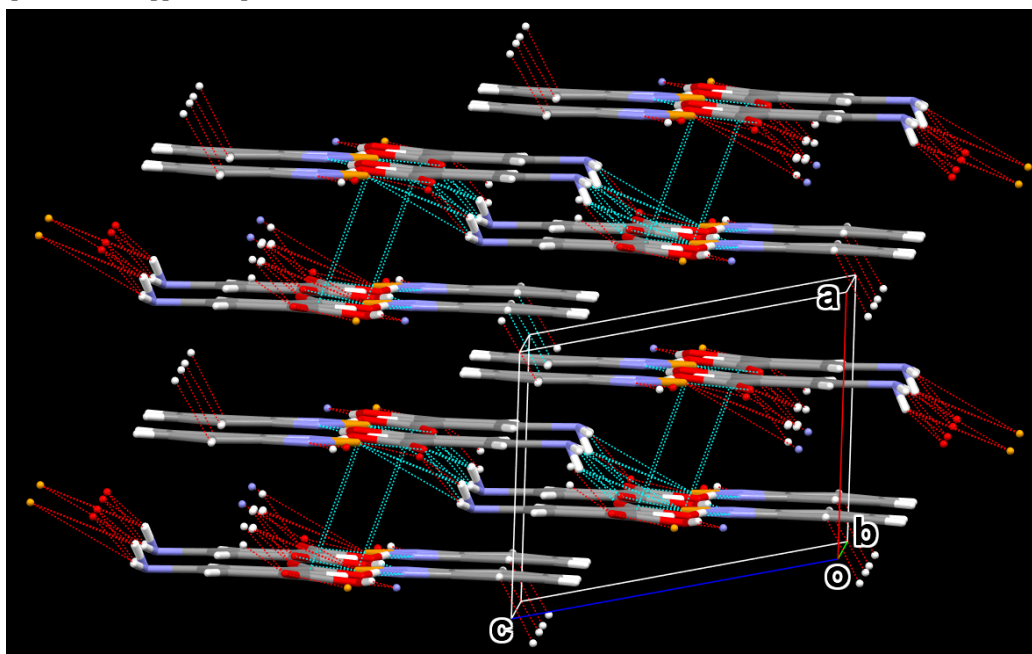

Fig. S1 The  $2 \times 2 \times 2$  unit cells of [IPA-5-NO<sub>2</sub>][BSeD], [IPA-5-Br][BSeD], [IPA-5-CH<sub>3</sub>][BSeD] and [IPA-5-NH<sub>2</sub>][BSeD]. Color code: H, white; C, gray; O, red; N, Blue; Se, orange; Br, brown.

[IPA-5-NO<sub>2</sub>][BSeD]

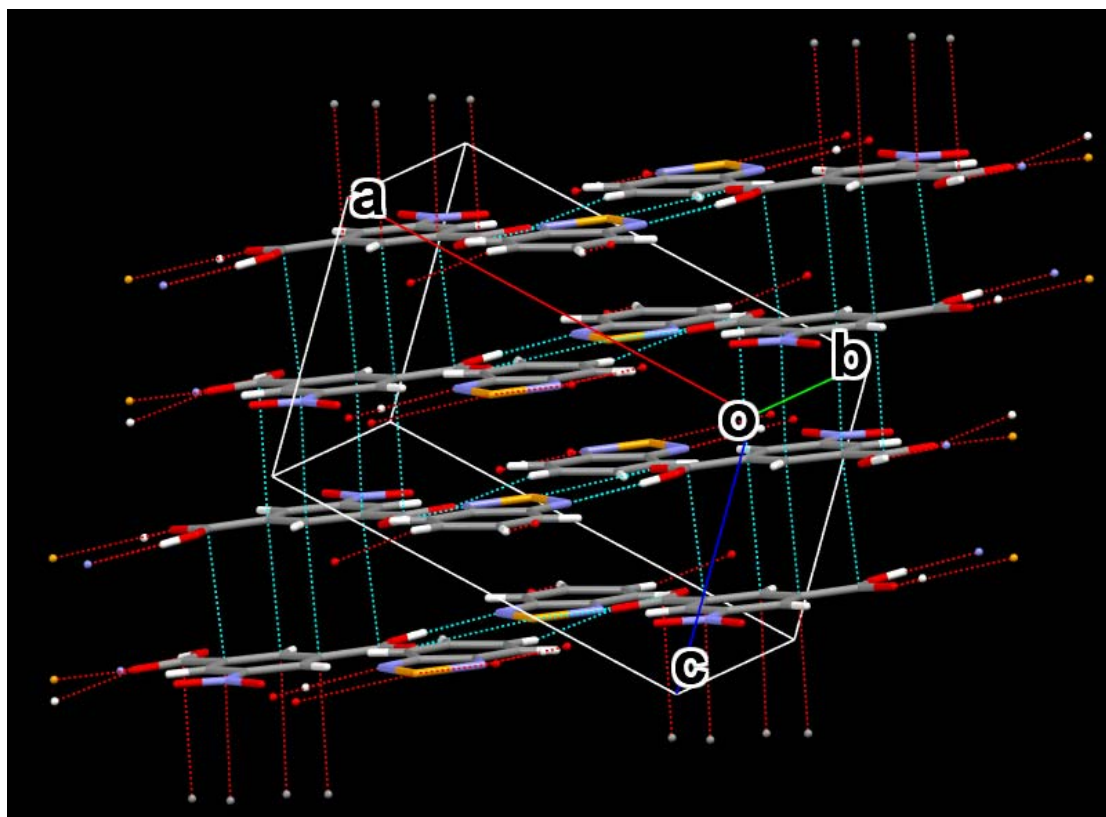

[IPA-5-Br][BSeD]

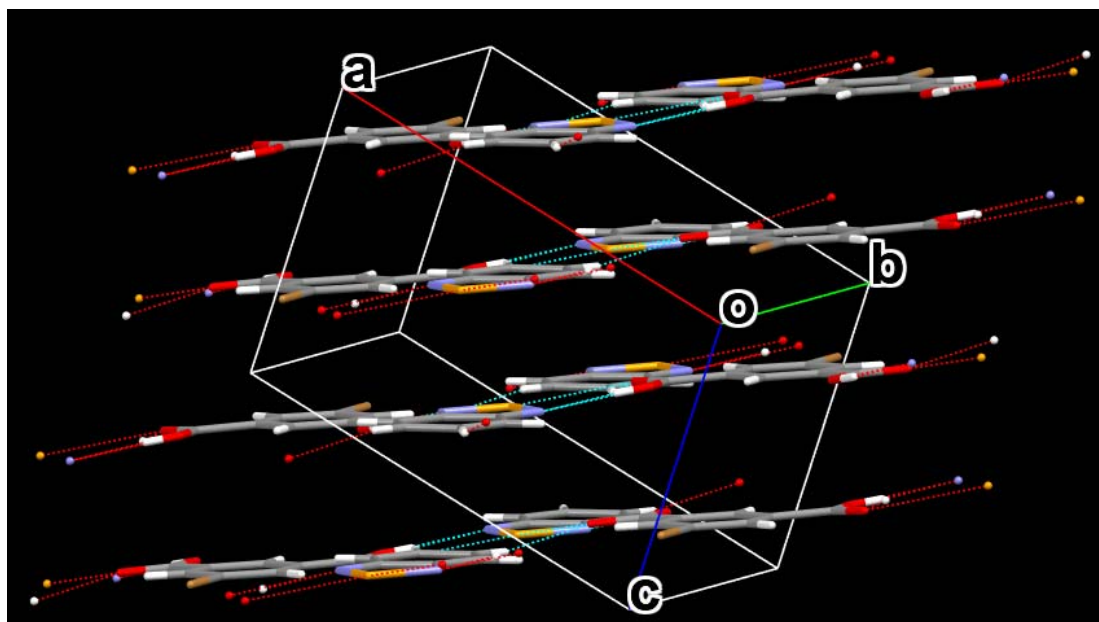

[IPA-5-CH<sub>3</sub>][BSeD]

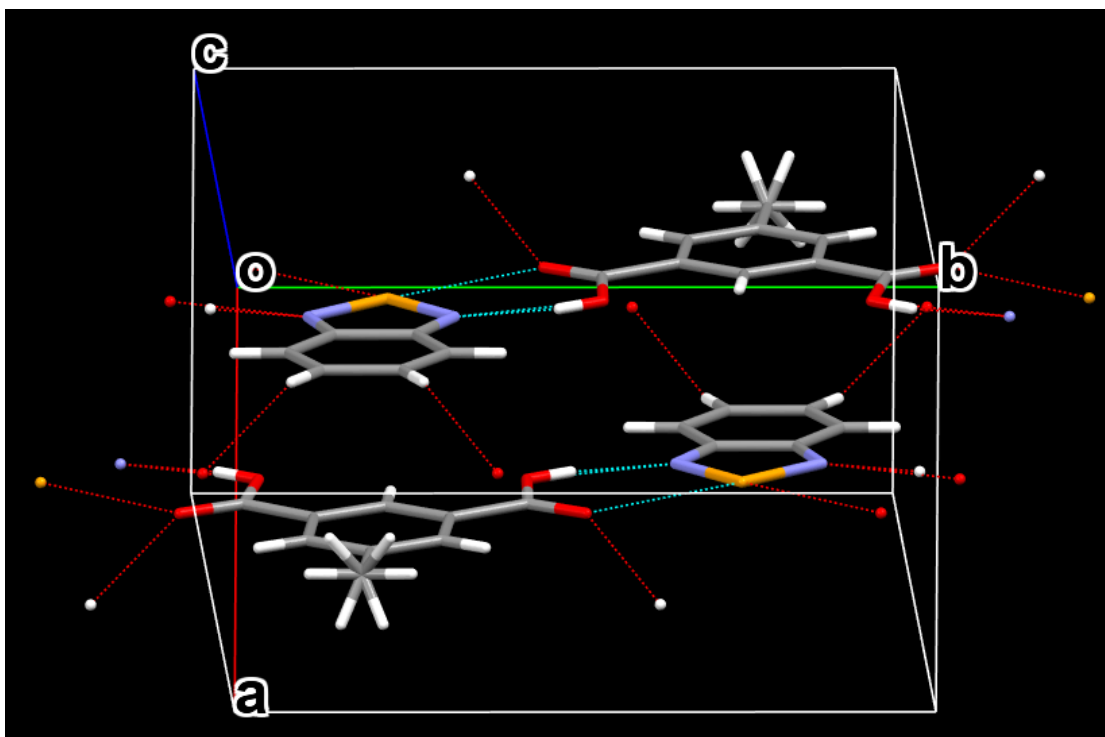

[IPA-5-NH<sub>2</sub>][BSeD]

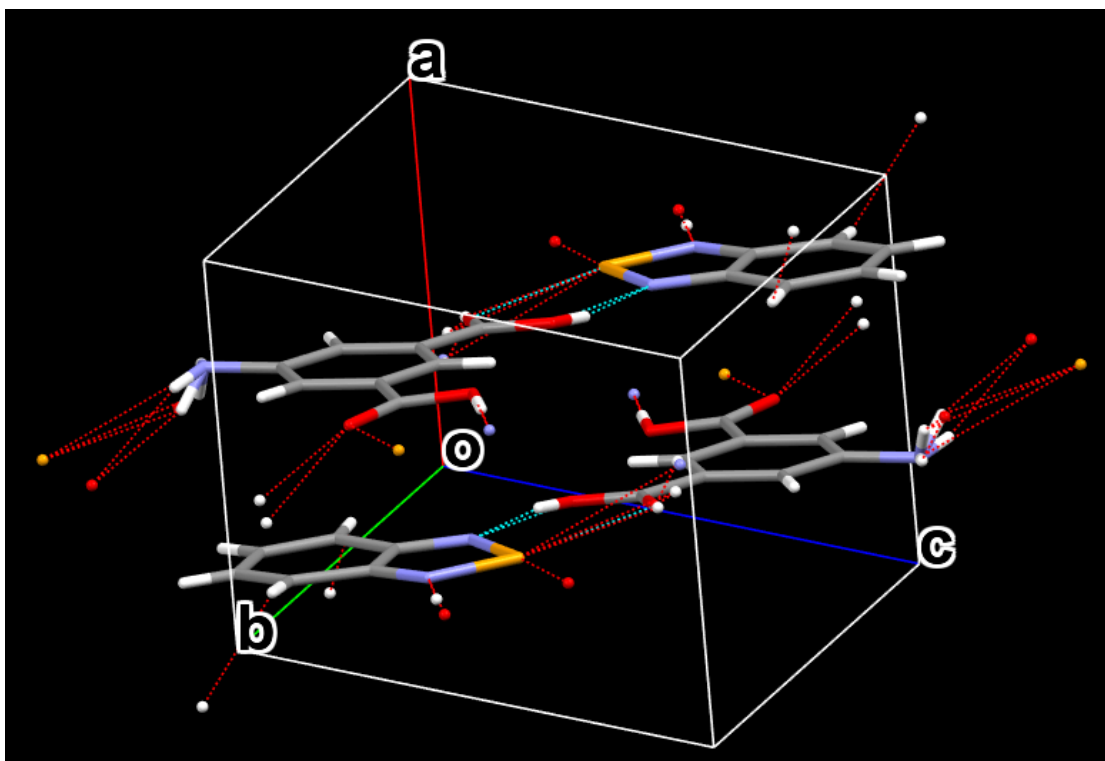

Fig. S2 The  $\pi \cdots \pi$  stacking interactions in the crystal structures of [IPA-5-NO<sub>2</sub>][BSeD], [IPA-5-Br][BSeD], [IPA-5-CH<sub>3</sub>][BSeD] and [IPA-5-NH<sub>2</sub>][BSeD]. Color code: H, white; C, gray; O, red; N, Blue; Se, orange; Br, brown.

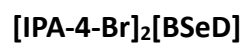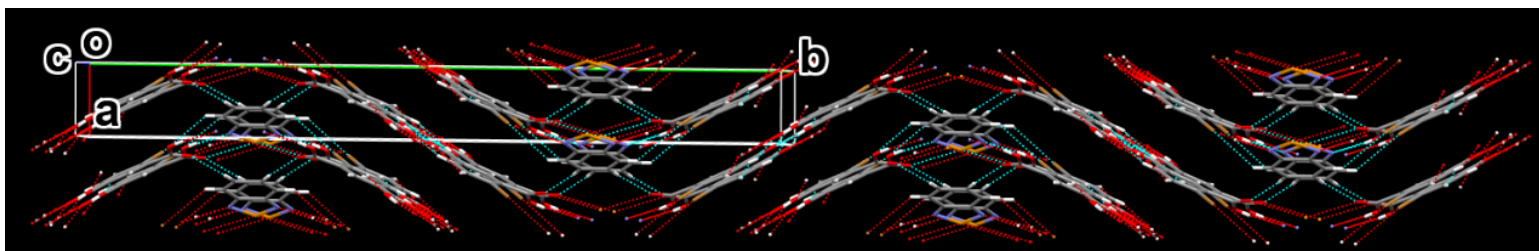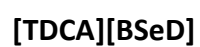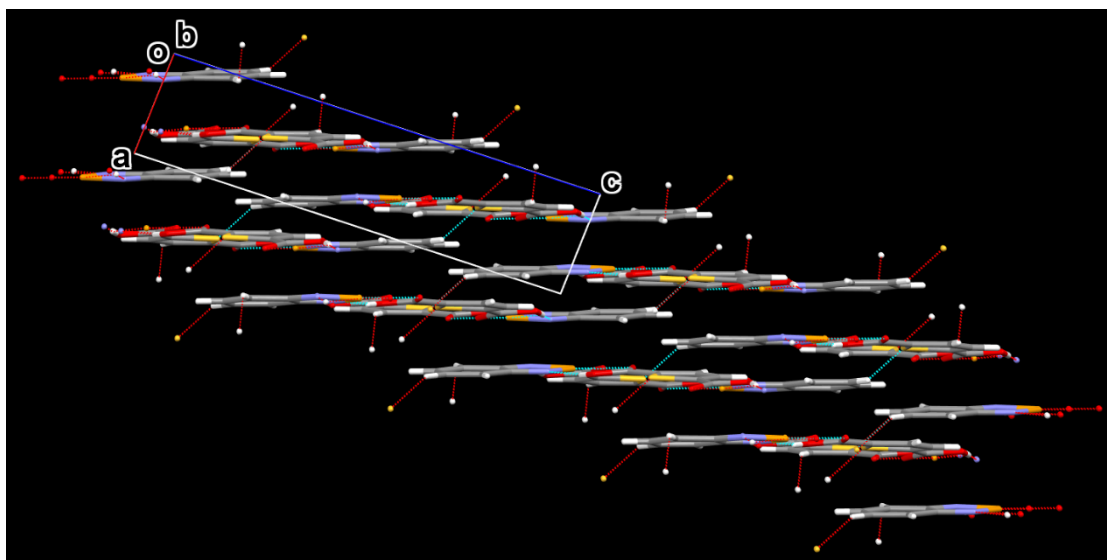

Fig. S3 The  $2 \times 2 \times 2$  unit cells of  $[\text{IPA-4-Br}]_2[\text{BSeD}]$  and  $[\text{TDCA}][\text{BSeD}]$ . Color code: H, white; C, gray; O, red; N, Blue; S yellow; Se, orange; Br, brown.

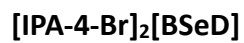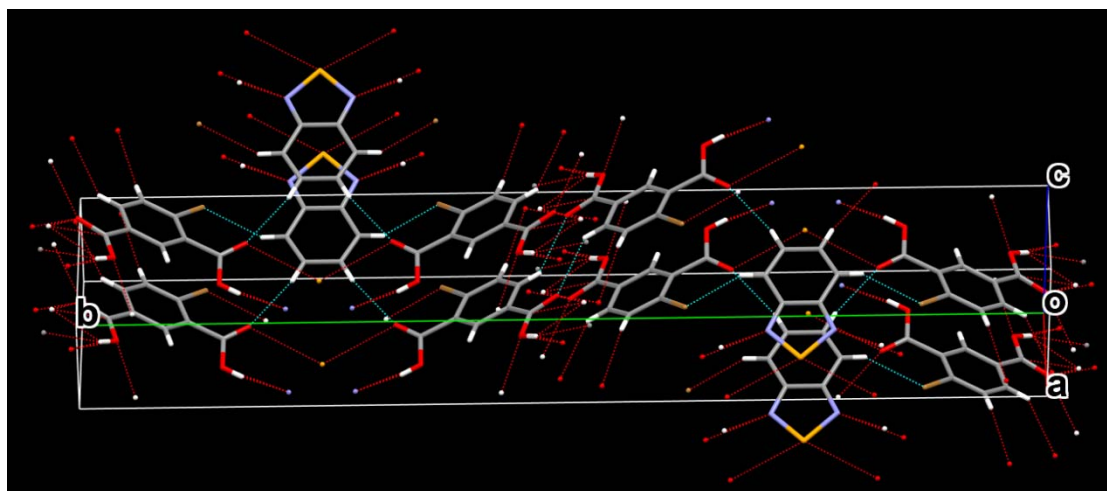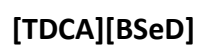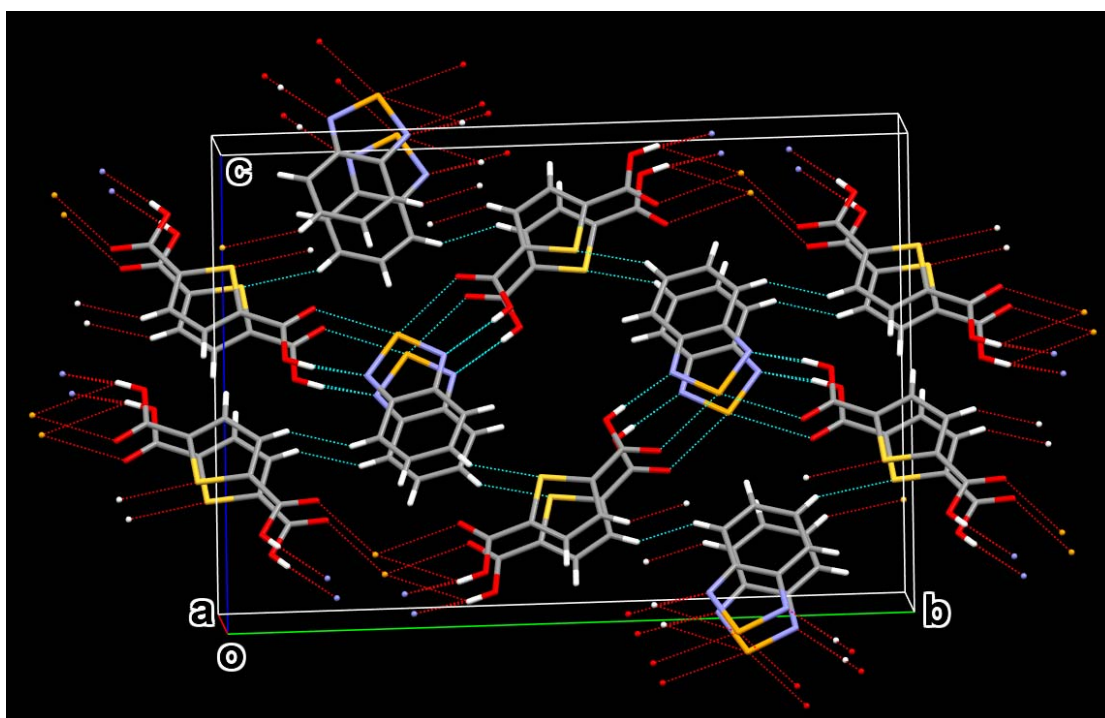

**Fig. S4** The  $\pi\cdots\pi$  stacking interactions in the crystal structures of [IPA-4-Br]<sub>2</sub>[BSeD] and [TDCA][BSeD]. Color code: H, white; C, gray; O, red; N, Blue; S yellow; Se, orange; Br, brown.

### S3. Notes and references

- 1 CrysAlisPro, Rigaku Oxford Diffraction, Version 1.171.36.32, England, 2013.
- 2 CrysAlisPro, Rigaku Oxford Diffraction, Version 1.171.38.41r, England, 2015.
- 3 G. M. Sheldrick, *SHELXS-97: Program for X-ray Crystal Structure Solution*, University of Gottingen: Gottingen, Germany, 1997.
- 4 G. M. Sheldrick, *SHELXS-97: Program for X-ray Crystal Structure Refinement*, University of Gottingen: Gottingen, Germany, 1997.
- 5 G. M. Sheldrick, *Acta Cryst.*, 2008, **A64**, 112–122.
- 6 C. Adamo and V. Barone, *J. Chem. Phys.*, 1999, **110**, 6158–6169.
- 7 S. Grimme, J. Antony, S. Ehrlich and H. Krieg, *J. Chem. Phys.*, 2010, **132**, 154104.
- 8 S. Grimme, S. Ehrlich and L. Goerigk, *J. Comput. Chem.*, 2011, **32**, 1456–1465.
- 9 F. Weigend and R. Ahlrichs, *Phys. Chem. Chem. Phys.*, 2005, **7**, 3297–3305.
- 10 Gaussian 09, Revision D.01, M. J. Frisch, G. W. Trucks, H. B. Schlegel, G. E. Scuseria, M. A. Robb, J. R. Cheeseman, G. Scalmani, V. Barone, B. Mennucci, G. A. Petersson, H. Nakatsuji, M. Caricato, X. Li, H. P. Hratchian, A. F. Izmaylov, J. Bloino, G. Zheng, J. L. Sonnenberg, M. Hada, M. Ehara, K. Toyota, R. Fukuda, J. Hasegawa, M. Ishida, T. Nakajima, Y. Honda, O. Kitao, H. Nakai, T. Vreven, J. A. Montgomery, Jr., J. E. Peralta, F. Ogliaro, M. Bearpark, J. J. Heyd, E. Brothers, K. N. Kudin, V. N. Staroverov, T. Keith, R. Kobayashi, J. Normand, K. Raghavachari, A. Rendell, J. C. Burant, S. S. Iyengar, J. Tomasi, M. Cossi, N. Rega, J. M. Millam, M. Klene, J. E. Knox, J. B. Cross, V. Bakken, C. Adamo, J. Jaramillo, R. Gomperts, R. E. Stratmann, O. Yazyev, A. J. Austin, R. Cammi, C. Pomelli, J. W. Ochterski, R. L. Martin, K. Morokuma, V. G. Zakrzewski, G. A. Voth, P. Salvador, J. J. Dannenberg, S. Dapprich, A. D. Daniels, O. Farkas, J. B. Foresman, J. V. Ortiz, J. Cioslowski, and D. J. Fox, Gaussian, Inc., Wallingford CT, 2013.
- 11 W. Wang, T. Sun, Y. Zhang and Y. B. Wang, *J. Chem. Phys.*, 2015, **143**, 114312.
- 12 W. Wang, Y. Zhang and Y. B. Wang, *Int. J. Quantum Chem.*, 2017, **117**, e25345.
- 13 S. F. Boys and F. Bernardi, *Mol. Phys.* 1970, **19**, 553–566.
- 14 R. F. W. Bader, *Atoms in Molecules, A Quantum Theory*, Clarendon Press, Oxford, 1990.
- 15 F. Biegler-König, J. Schönbohm and D. Bayles, *J. Comput. Chem.*, 2001, **22**, 545–559.

**S4. The CheckCIF reports for the six cocrystals.**

## checkCIF/PLATON report

Structure factors have been supplied for datablock(s) 2429784

THIS REPORT IS FOR GUIDANCE ONLY. IF USED AS PART OF A REVIEW PROCEDURE FOR PUBLICATION, IT SHOULD NOT REPLACE THE EXPERTISE OF AN EXPERIENCED CRYSTALLOGRAPHIC REFEREE.

No syntax errors found.      CIF dictionary      Interpreting this report

### Datablock: 2429784

---

|                 |                           |                                                             |
|-----------------|---------------------------|-------------------------------------------------------------|
| Bond precision: | C-C = 0.0037 A            | Wavelength=0.71073                                          |
| Cell:           | a=11.3555 (4)<br>alpha=90 | b=9.1502 (3)<br>beta=99.648 (5)<br>c=7.1692 (4)<br>gamma=90 |
| Temperature:    | 293 K                     |                                                             |
|                 | Calculated                | Reported                                                    |
| Volume          | 734.38 (6)                | 734.38 (6)                                                  |
| Space group     | P 2/c                     | P 1 2/c 1                                                   |
| Hall group      | -P 2yc                    | -P 2yc                                                      |
| Moiety formula  | C8 H5 N O6, C6 H4 N2 Se   | C6 H4 N2 Se, C8 H5 N O6                                     |
| Sum formula     | C14 H9 N3 O6 Se           | C14 H9 N3 O6 Se                                             |
| Mr              | 394.20                    | 394.20                                                      |
| Dx, g cm-3      | 1.783                     | 1.783                                                       |
| Z               | 2                         | 2                                                           |
| Mu (mm-1)       | 2.595                     | 2.595                                                       |
| F000            | 392.0                     | 392.3                                                       |
| F000'           | 392.01                    |                                                             |
| h,k,lmax        | 15,12,9                   | 15,12,9                                                     |
| Nref            | 1988                      | 1733                                                        |
| Tmin,Tmax       | 0.464,0.627               | 0.772,1.000                                                 |
| Tmin'           | 0.455                     |                                                             |

Correction method= # Reported T Limits: Tmin=0.772 Tmax=1.000  
AbsCorr = MULTI-SCAN

Data completeness= 0.872      Theta(max)= 29.200

|                               |                                 |
|-------------------------------|---------------------------------|
| R(reflections)= 0.0384( 1484) | wR2(reflections)= 0.0829( 1733) |
| S = 1.076                     | Npar= 112                       |



---

The following ALERTS were generated. Each ALERT has the format

**test-name\_ALERT\_alert-type\_alert-level.**

Click on the hyperlinks for more details of the test.

---

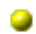

### Alert level C

PLAT029\_ALERT\_3\_C \_diffn\_measured\_fraction\_theta\_full value Low . 0.961 Why?  
PLAT042\_ALERT\_1\_C Calc. and Reported MoietyFormula Strings Differ Please Check  
Calc: C8 H5 N O6, C6 H4 N2 Se  
Rep.: C6 H4 N2 Se, C8 H5 N O6  
PLAT250\_ALERT\_2\_C Large U3/U1 Ratio for <U(i,j)> Tensor(Resd 1) 2.7 Note  
PLAT906\_ALERT\_3\_C Large K Value in the Analysis of Variance ..... 3.227 Check  
PLAT911\_ALERT\_3\_C Missing FCF Refl Between Thmin & STh/L= 0.600 49 Report

|    |   |    |    |   |    |    |   |    |    |   |    |   |   |    |    |   |    |
|----|---|----|----|---|----|----|---|----|----|---|----|---|---|----|----|---|----|
| 12 | 0 | 2, | 12 | 1 | 2, | 12 | 2 | 2, | 4  | 1 | 3, | 5 | 1 | 3, | 10 | 1 | 3, |
| 11 | 1 | 3, | 11 | 2 | 3, | 11 | 3 | 3, | 4  | 0 | 4, | 4 | 1 | 4, | 5  | 0 | 4, |
| 5  | 1 | 4, | 5  | 2 | 4, | 6  | 0 | 4, | 6  | 1 | 4, | 6 | 2 | 4, | 7  | 0 | 4, |
| 7  | 1 | 4, | 7  | 2 | 4, | 8  | 0 | 4, | 8  | 1 | 4, | 8 | 2 | 4, | 9  | 0 | 4, |
| 9  | 1 | 4, | 10 | 0 | 4, | 10 | 1 | 4, | 10 | 2 | 4, | 4 | 1 | 5, | 5  | 1 | 5, |
| 6  | 1 | 5, | 7  | 1 | 5, | 7  | 2 | 5, | 8  | 1 | 5, | 8 | 2 | 5, | 9  | 1 | 5, |
| 9  | 2 | 5, | 1  | 0 | 6, | 2  | 0 | 6, | 3  | 0 | 6, | 4 | 0 | 6, | 4  | 1 | 6, |
| 5  | 0 | 6, | 5  | 1 | 6, | 6  | 0 | 6, | 6  | 1 | 6, | 7 | 0 | 6, | 7  | 1 | 6, |
| 8  | 0 | 6, |    |   |    |    |   |    |    |   |    |   |   |    |    |   |    |

---

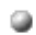

### Alert level G

PLAT068\_ALERT\_1\_G Reported F000 Differs from Calcd (or Missing)... Please Check  
PLAT073\_ALERT\_1\_G H-atoms ref., but hydrogen treatment Reported as constr Check  
PLAT199\_ALERT\_1\_G Reported \_cell\_measurement\_temperature ..... (K) 293 Check  
PLAT200\_ALERT\_1\_G Reported \_diffn\_ambient\_temperature ..... (K) 293 Check  
PLAT769\_ALERT\_4\_G CIF Embedded Explicitly Supplied Scattering Data Please Note  
PLAT910\_ALERT\_3\_G Missing # of FCF Reflection(s) Below Theta(Min). 3 Note  
0 1 0, 1 0 0, 1 1 0,  
PLAT912\_ALERT\_4\_G Missing # of FCF Reflections Above STh/L= 0.600 203 Note  
PLAT969\_ALERT\_5\_G The 'Henn et al.' R-Factor-gap value ..... 2.520 Note  
Predicted wR2: Based on SigI\*\*2 3.29 or SHELX Weight 7.70  
PLAT978\_ALERT\_2\_G Number C-C Bonds with Positive Residual Density. 3 Info  
PLAT982\_ALERT\_1\_G The Se-f' = -0.0811 Deviates from IT-Value = -0.0929 Check  
PLAT983\_ALERT\_1\_G The Se-f" = 2.3083 Deviates from IT-Value = 2.2259 Check

---

- 0 **ALERT level A** = Most likely a serious problem - resolve or explain  
0 **ALERT level B** = A potentially serious problem, consider carefully  
5 **ALERT level C** = Check. Ensure it is not caused by an omission or oversight  
11 **ALERT level G** = General information/check it is not something unexpected
- 7 ALERT type 1 CIF construction/syntax error, inconsistent or missing data  
2 ALERT type 2 Indicator that the structure model may be wrong or deficient  
4 ALERT type 3 Indicator that the structure quality may be low  
2 ALERT type 4 Improvement, methodology, query or suggestion  
1 ALERT type 5 Informative message, check
-

It is advisable to attempt to resolve as many as possible of the alerts in all categories. Often the minor alerts point to easily fixed oversights, errors and omissions in your CIF or refinement strategy, so attention to these fine details can be worthwhile. In order to resolve some of the more serious problems it may be necessary to carry out additional measurements or structure refinements. However, the purpose of your study may justify the reported deviations and the more serious of these should normally be commented upon in the discussion or experimental section of a paper or in the "special\_details" fields of the CIF. checkCIF was carefully designed to identify outliers and unusual parameters, but every test has its limitations and alerts that are not important in a particular case may appear. Conversely, the absence of alerts does not guarantee there are no aspects of the results needing attention. It is up to the individual to critically assess their own results and, if necessary, seek expert advice.

### **Publication of your CIF in IUCr journals**

A basic structural check has been run on your CIF. These basic checks will be run on all CIFs submitted for publication in IUCr journals (*Acta Crystallographica*, *Journal of Applied Crystallography*, *Journal of Synchrotron Radiation*); however, if you intend to submit to *Acta Crystallographica Section C* or *E* or *IUCrData*, you should make sure that full publication checks are run on the final version of your CIF prior to submission.

### **Publication of your CIF in other journals**

Please refer to the *Notes for Authors* of the relevant journal for any special instructions relating to CIF submission.

---

**PLATON version of 02/02/2025; check.def file version of 02/02/2025**

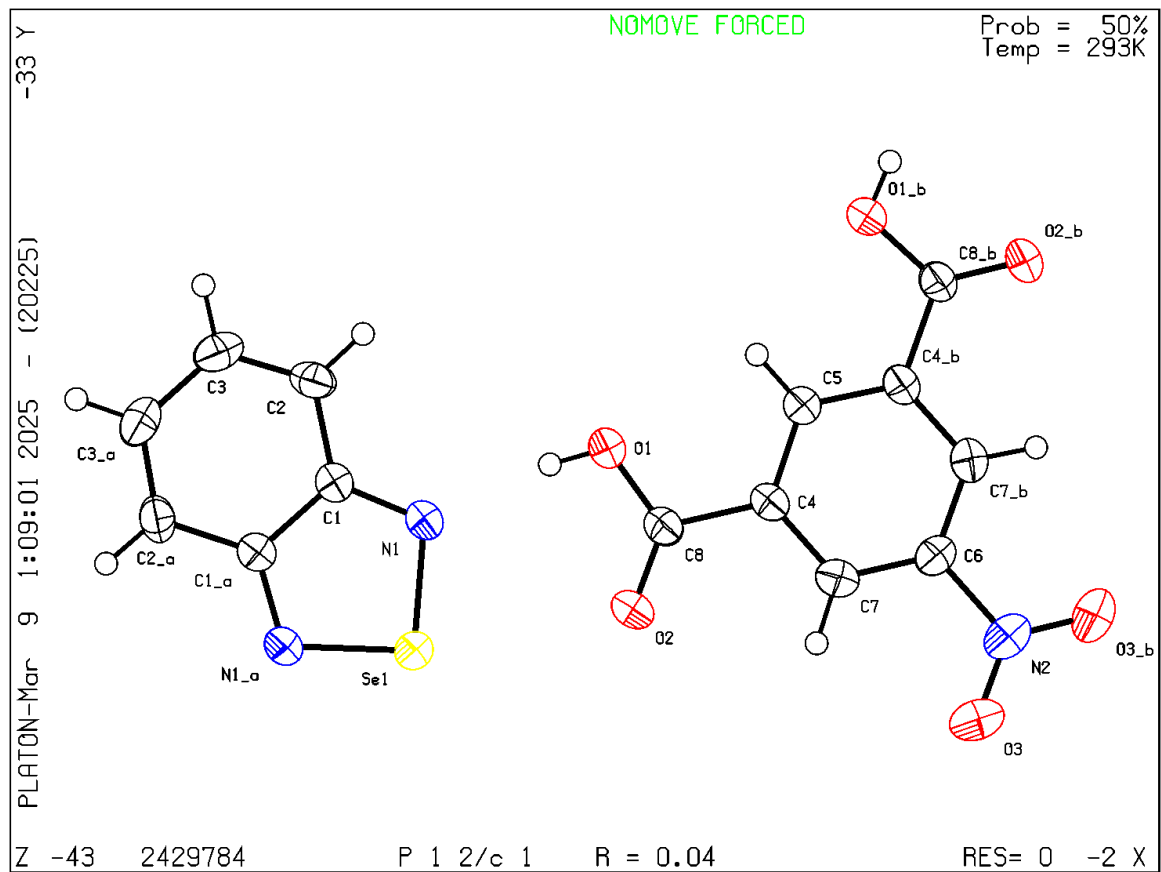

## checkCIF/PLATON report

Structure factors have been supplied for datablock(s) 2429785

THIS REPORT IS FOR GUIDANCE ONLY. IF USED AS PART OF A REVIEW PROCEDURE FOR PUBLICATION, IT SHOULD NOT REPLACE THE EXPERTISE OF AN EXPERIENCED CRYSTALLOGRAPHIC REFEREE.

No syntax errors found.      CIF dictionary      Interpreting this report

### Datablock: 2429785

---

|                        |                          |                                |
|------------------------|--------------------------|--------------------------------|
| Bond precision:        | C-C = 0.0063 Å           | Wavelength=0.71073             |
| Cell:                  | a=11.154 (3)<br>alpha=90 | b=9.184 (2)<br>beta=99.177 (9) |
|                        |                          | c=7.3865 (19)<br>gamma=90      |
| Temperature:           | 300 K                    |                                |
|                        | Calculated               | Reported                       |
| Volume                 | 747.0 (3)                | 746.9 (3)                      |
| Space group            | P 2/c                    | P 1 2/c 1                      |
| Hall group             | -P 2yc                   | -P 2yc                         |
| Moiety formula         | C8 H5 Br O4, C6 H4 N2 Se | C6 H4 N2 Se, C8 H5 Br O4       |
| Sum formula            | C14 H9 Br N2 O4 Se       | C14 H9 Br N2 O4 Se             |
| Mr                     | 428.09                   | 428.10                         |
| Dx, g cm <sup>-3</sup> | 1.903                    | 1.903                          |
| Z                      | 2                        | 2                              |
| Mu (mm <sup>-1</sup> ) | 5.206                    | 5.207                          |
| F000                   | 416.0                    | 416.0                          |
| F000'                  | 415.46                   |                                |
| h,k,lmax               | 14,12,9                  | 14,11,9                        |
| Nref                   | 1780                     | 1758                           |
| Tmin,Tmax              | 0.452,0.508              | 0.343,0.746                    |
| Tmin'                  | 0.418                    |                                |

Correction method= # Reported T Limits: Tmin=0.343 Tmax=0.746  
AbsCorr = MULTI-SCAN

Data completeness= 0.988      Theta(max)= 27.828

|                               |                                 |
|-------------------------------|---------------------------------|
| R(reflections)= 0.0515( 1231) | wR2(reflections)= 0.1144( 1758) |
| S = 1.027                     | Npar= 103                       |

---

The following ALERTS were generated. Each ALERT has the format

**test-name\_ALERT\_alert-type\_alert-level.**

Click on the hyperlinks for more details of the test.

---



#### Alert level C

|                   |                                                 |              |
|-------------------|-------------------------------------------------|--------------|
| PLAT042_ALERT_1_C | Calc. and Reported MoietyFormula Strings Differ | Please Check |
|                   | Calc: C8 H5 Br O4, C6 H4 N2 Se                  |              |
|                   | Rep.: C6 H4 N2 Se, C8 H5 Br O4                  |              |
| PLAT242_ALERT_2_C | Low 'MainMol' Ueq as Compared to Neighbors of   | C7 Check     |
| PLAT334_ALERT_2_C | Small <C-C> Benzene Dist. C5 -C8 .              | 1.37 Ang.    |
| PLAT341_ALERT_3_C | Low Bond Precision on C-C Bonds .....           | 0.00625 Ang. |
| PLAT906_ALERT_3_C | Large K Value in the Analysis of Variance ..... | 4.804 Check  |
| PLAT911_ALERT_3_C | Missing FCF Refl Between Thmin & STh/L= 0.600   | 3 Report     |
|                   | 2 0 0, -2 0 2, 0 0 2,                           |              |

---



#### Alert level G

|                   |                                                            |              |
|-------------------|------------------------------------------------------------|--------------|
| PLAT007_ALERT_5_G | Number of Unrefined Donor-H Atoms .....                    | 1 Report     |
|                   | H2                                                         |              |
| PLAT012_ALERT_1_G | N.O.K. _shelx_res_checksum Found in CIF .....              | Please Check |
| PLAT910_ALERT_3_G | Missing # of FCF Reflection(s) Below Theta(Min).           | 2 Note       |
|                   | 0 1 0, 1 0 0,                                              |              |
| PLAT912_ALERT_4_G | Missing # of FCF Reflections Above STh/L= 0.600            | 14 Note      |
| PLAT913_ALERT_3_G | Missing # of Very Strong Reflections in FCF ....           | 3 Note       |
|                   | 2 0 0, -2 0 2, 0 0 2,                                      |              |
| PLAT933_ALERT_2_G | Number of HKL-OMIT Records in Embedded .res File           | 1 Note       |
|                   | 2 0 0,                                                     |              |
| PLAT969_ALERT_5_G | The 'Henn et al.' R-Factor-gap value .....                 | 1.517 Note   |
|                   | Predicted wR2: Based on SigI**2 7.54 or SHELX Weight 11.14 |              |
| PLAT978_ALERT_2_G | Number C-C Bonds with Positive Residual Density.           | 2 Info       |
| PLAT992_ALERT_5_G | Repd & Actual _reflns_number_gt Values Differ by           | 2 Check      |

---

- 0 **ALERT level A** = Most likely a serious problem - resolve or explain  
0 **ALERT level B** = A potentially serious problem, consider carefully  
6 **ALERT level C** = Check. Ensure it is not caused by an omission or oversight  
9 **ALERT level G** = General information/check it is not something unexpected

- 2 ALERT type 1 CIF construction/syntax error, inconsistent or missing data  
4 ALERT type 2 Indicator that the structure model may be wrong or deficient  
5 ALERT type 3 Indicator that the structure quality may be low  
1 ALERT type 4 Improvement, methodology, query or suggestion  
3 ALERT type 5 Informative message, check
-

It is advisable to attempt to resolve as many as possible of the alerts in all categories. Often the minor alerts point to easily fixed oversights, errors and omissions in your CIF or refinement strategy, so attention to these fine details can be worthwhile. In order to resolve some of the more serious problems it may be necessary to carry out additional measurements or structure refinements. However, the purpose of your study may justify the reported deviations and the more serious of these should normally be commented upon in the discussion or experimental section of a paper or in the "special\_details" fields of the CIF. checkCIF was carefully designed to identify outliers and unusual parameters, but every test has its limitations and alerts that are not important in a particular case may appear. Conversely, the absence of alerts does not guarantee there are no aspects of the results needing attention. It is up to the individual to critically assess their own results and, if necessary, seek expert advice.

### **Publication of your CIF in IUCr journals**

A basic structural check has been run on your CIF. These basic checks will be run on all CIFs submitted for publication in IUCr journals (*Acta Crystallographica*, *Journal of Applied Crystallography*, *Journal of Synchrotron Radiation*); however, if you intend to submit to *Acta Crystallographica Section C* or *E* or *IUCrData*, you should make sure that full publication checks are run on the final version of your CIF prior to submission.

### **Publication of your CIF in other journals**

Please refer to the *Notes for Authors* of the relevant journal for any special instructions relating to CIF submission.

---

**PLATON version of 02/02/2025; check.def file version of 02/02/2025**

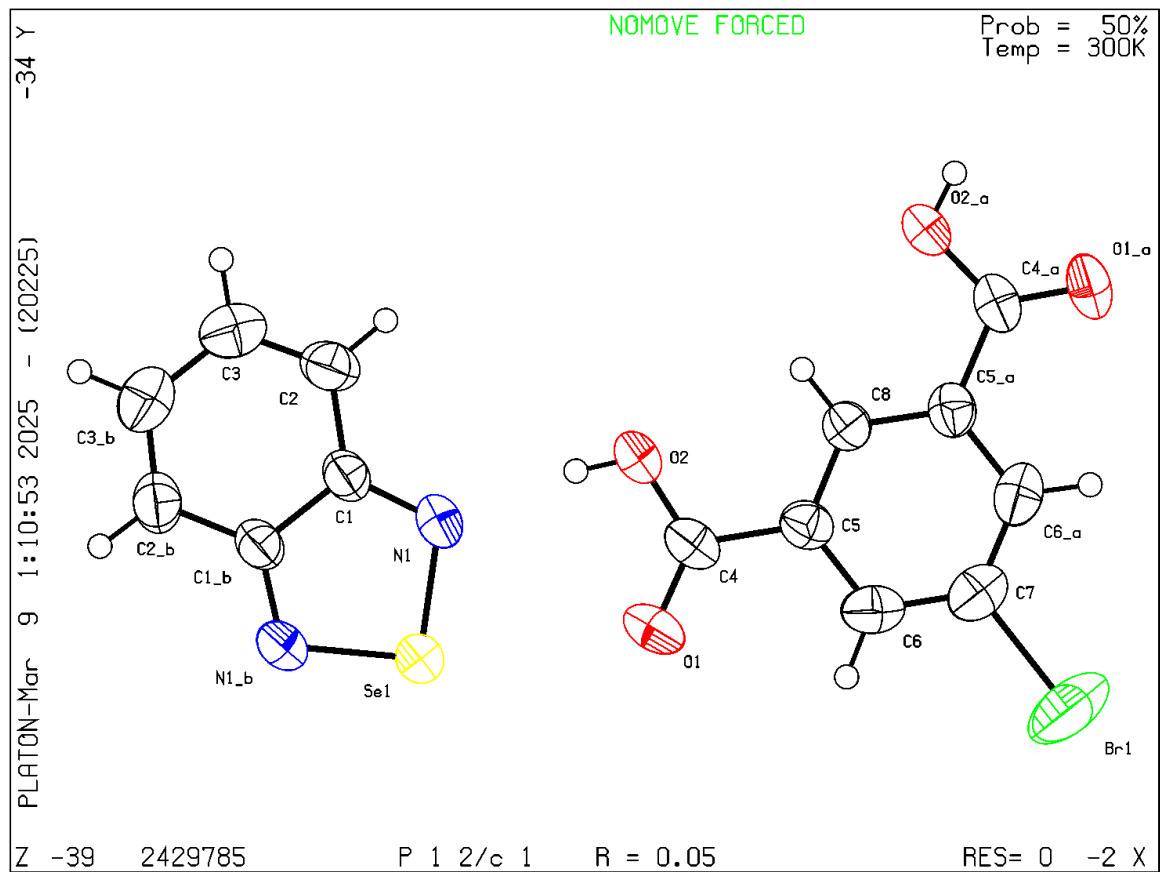

## checkCIF/PLATON report

Structure factors have been supplied for datablock(s) 2429786\_auto

THIS REPORT IS FOR GUIDANCE ONLY. IF USED AS PART OF A REVIEW PROCEDURE FOR PUBLICATION, IT SHOULD NOT REPLACE THE EXPERTISE OF AN EXPERIENCED CRYSTALLOGRAPHIC REFEREE.

No syntax errors found. CIF dictionary Interpreting this report

**Datablock: 2429786 auto**

|                 |                |                    |             |
|-----------------|----------------|--------------------|-------------|
| Bond precision: | C-C = 0.0031 Å | Wavelength=0.71073 |             |
| Cell:           | a=7.4596(4)    | b=12.3445(6)       | c=8.6525(4) |
|                 | alpha=90       | beta=112.155(6)    | gamma=90    |
| Temperature:    | 293 K          |                    |             |

|                | Calculated            | Reported              |
|----------------|-----------------------|-----------------------|
| Volume         | 737.94 (7)            | 737.94 (7)            |
| Space group    | P 21/m                | P 1 21/m 1            |
| Hall group     | -P 2yb                | -P 2yb                |
| Moiety formula | C9 H8 O4, C6 H4 N2 Se | C6 H4 N2 Se, C9 H8 O4 |
| Sum formula    | C15 H12 N2 O4 Se      | C15 H12 N2 O4 Se      |
| Mr             | 363.23                | 363.23                |
| Dx, g cm-3     | 1.635                 | 1.635                 |
| Z              | 2                     | 2                     |
| Mu (mm-1)      | 2.564                 | 2.564                 |
| F000           | 364.0                 | 364.2                 |
| F000'          | 363.98                |                       |
| h, k, lmax     | 10, 16, 11            | 9, 16, 11             |
| Nref           | 2098                  | 1873                  |
| Tmin, Tmax     | 0.519, 0.599          | 0.847, 1.000          |
| Tmin'          | 0.508                 |                       |

```
Correction method= # Reported T Limits: Tmin=0.847 Tmax=1.000
AbsCorr = MULTI-SCAN
```

Data completeness= 0.893                      Theta (max)= 29.270

```
R(reflections)= 0.0346( 1609)      wR2(reflections)=
S = 1.042                          0.0702( 1873)
Npar= 108
```



---

The following ALERTS were generated. Each ALERT has the format

**test-name\_ALERT\_alert-type\_alert-level.**

Click on the hyperlinks for more details of the test.

---

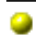

### Alert level C

|                   |                                                  |              |
|-------------------|--------------------------------------------------|--------------|
| PLAT042_ALERT_1_C | Calc. and Reported MoietyFormula Strings Differ  | Please Check |
|                   | Calc: C9 H8 O4, C6 H4 N2 Se                      |              |
|                   | Rep.: C6 H4 N2 Se, C9 H8 O4                      |              |
| PLAT906_ALERT_3_C | Large K Value in the Analysis of Variance .....  | 3.051 Check  |
| PLAT910_ALERT_3_C | Missing # of FCF Reflection(s) Below Theta(Min). | 5 Note       |
|                   | 1 0 0, 0 2 0, -1 0 1, 0 0 1, 0 1 1,              |              |

---

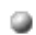

### Alert level G

|                   |                                                      |               |
|-------------------|------------------------------------------------------|---------------|
| PLAT068_ALERT_1_G | Reported F000 Differs from Calcd (or Missing)...     | Please Check  |
| PLAT073_ALERT_1_G | H-atoms ref., but hydrogen treatment Reported as     | constr Check  |
| PLAT199_ALERT_1_G | Reported _cell_measurement_temperature ..... (K)     | 293 Check     |
| PLAT200_ALERT_1_G | Reported _diffn_ambient_temperature ..... (K)        | 293 Check     |
| PLAT299_ALERT_4_G | Atom Site Occupancy Constrained at .....             | 0.5 Check     |
|                   | H9A H9B H9C                                          |               |
| PLAT367_ALERT_2_G | Long? C(sp?)-C(sp?) Bond C6 - C9 .                   | 1.52 Ang.     |
| PLAT769_ALERT_4_G | CIF Embedded Explicitly Supplied Scattering Data     | Please Note   |
| PLAT789_ALERT_4_G | Atoms with Negative _atom_site_disorder_group #      | 3 Check       |
| PLAT822_ALERT_4_G | CIF-embedded .res Contains Negative PART Numbers     | 1 Check       |
| PLAT912_ALERT_4_G | Missing # of FCF Reflections Above STh/L= 0.600      | 203 Note      |
| PLAT969_ALERT_5_G | The 'Henn et al.' R-Factor-gap value .....           | 2.967 Note    |
|                   | Predicted wR2: Based on SigI**2 2.36 or SHELX Weight | 6.73          |
| PLAT978_ALERT_2_G | Number C-C Bonds with Positive Residual Density.     | 4 Info        |
| PLAT982_ALERT_1_G | The Se-f' = -0.0811 Deviates from IT-Value =         | -0.0929 Check |
| PLAT983_ALERT_1_G | The Se-f" = 2.3083 Deviates from IT-Value =          | 2.2259 Check  |

---

- 0 **ALERT level A** = Most likely a serious problem - resolve or explain  
0 **ALERT level B** = A potentially serious problem, consider carefully  
3 **ALERT level C** = Check. Ensure it is not caused by an omission or oversight  
14 **ALERT level G** = General information/check it is not something unexpected
- 7 ALERT type 1 CIF construction/syntax error, inconsistent or missing data  
2 ALERT type 2 Indicator that the structure model may be wrong or deficient  
2 ALERT type 3 Indicator that the structure quality may be low  
5 ALERT type 4 Improvement, methodology, query or suggestion  
1 ALERT type 5 Informative message, check
-

It is advisable to attempt to resolve as many as possible of the alerts in all categories. Often the minor alerts point to easily fixed oversights, errors and omissions in your CIF or refinement strategy, so attention to these fine details can be worthwhile. In order to resolve some of the more serious problems it may be necessary to carry out additional measurements or structure refinements. However, the purpose of your study may justify the reported deviations and the more serious of these should normally be commented upon in the discussion or experimental section of a paper or in the "special\_details" fields of the CIF. checkCIF was carefully designed to identify outliers and unusual parameters, but every test has its limitations and alerts that are not important in a particular case may appear. Conversely, the absence of alerts does not guarantee there are no aspects of the results needing attention. It is up to the individual to critically assess their own results and, if necessary, seek expert advice.

### **Publication of your CIF in IUCr journals**

A basic structural check has been run on your CIF. These basic checks will be run on all CIFs submitted for publication in IUCr journals (*Acta Crystallographica*, *Journal of Applied Crystallography*, *Journal of Synchrotron Radiation*); however, if you intend to submit to *Acta Crystallographica Section C* or *E* or *IUCrData*, you should make sure that full publication checks are run on the final version of your CIF prior to submission.

### **Publication of your CIF in other journals**

Please refer to the *Notes for Authors* of the relevant journal for any special instructions relating to CIF submission.

---

**PLATON version of 02/02/2025; check.def file version of 02/02/2025**

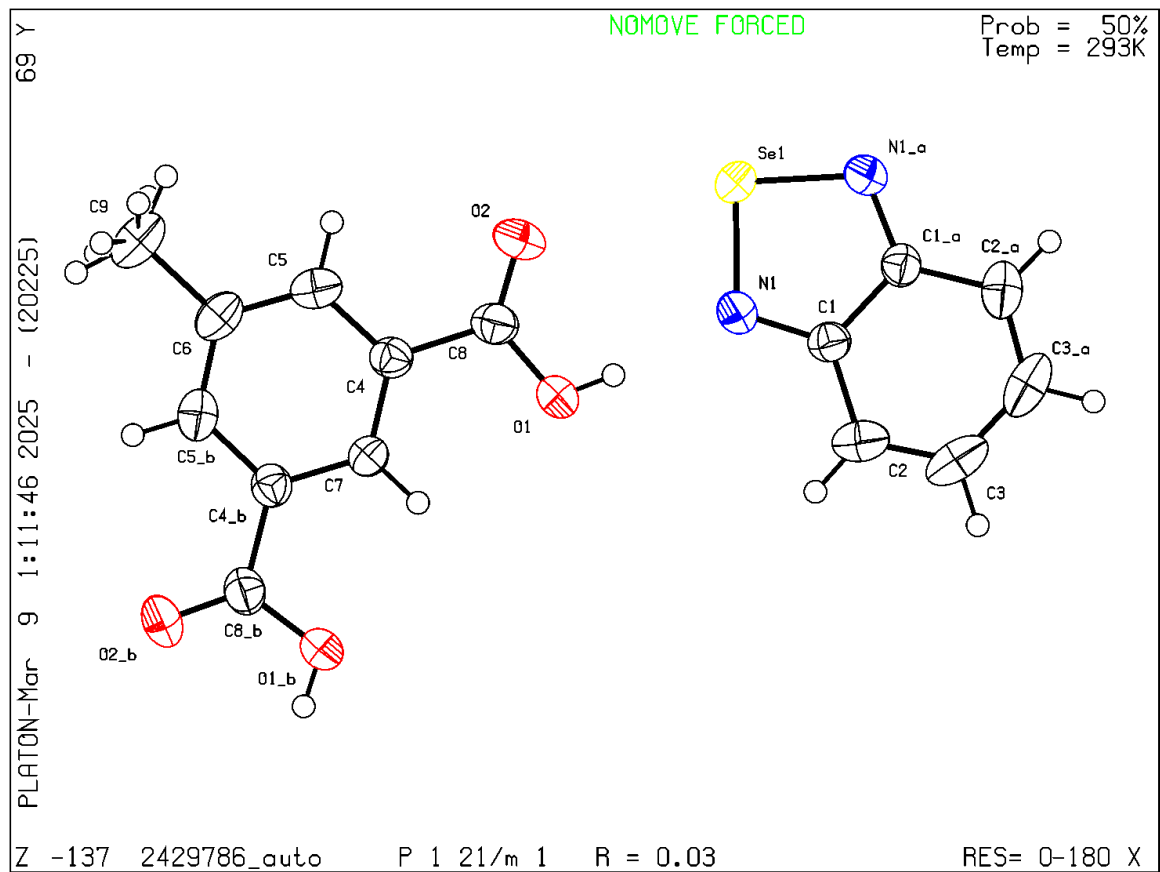

## checkCIF/PLATON report

Structure factors have been supplied for datablock(s) 2429787

THIS REPORT IS FOR GUIDANCE ONLY. IF USED AS PART OF A REVIEW PROCEDURE FOR PUBLICATION, IT SHOULD NOT REPLACE THE EXPERTISE OF AN EXPERIENCED CRYSTALLOGRAPHIC REFEREE.

No syntax errors found. CIF dictionary Interpreting this report

**Datablock: 2429787**

|                 |                |                    |              |
|-----------------|----------------|--------------------|--------------|
| Bond precision: | C-C = 0.0075 Å | Wavelength=1.54178 |              |
| Cell:           | a=6.8417 (7)   | b=12.3348 (11)     | c=8.5209 (7) |
|                 | alpha=90       | beta=102.207 (4)   | gamma=90     |
| Temperature:    | 300 K          |                    |              |

|                        | Calculated              | Reported                |
|------------------------|-------------------------|-------------------------|
| Volume                 | 702.83(11)              | 702.83(11)              |
| Space group            | P 21/m                  | P 1 21/m 1              |
| Hall group             | -P 2yb                  | -P 2yb                  |
| Moiety formula         | C8 H7 N O4, C6 H4 N2 Se | C6 H4 N2 Se, C8 H7 N O4 |
| Sum formula            | C14 H11 N3 O4 Se        | C14 H11 N3 O4 Se        |
| Mr                     | 364.22                  | 364.22                  |
| Dx, g cm <sup>-3</sup> | 1.721                   | 1.721                   |
| Z                      | 2                       | 2                       |
| Mu (mm <sup>-1</sup> ) | 3.842                   | 3.842                   |
| F000                   | 364.0                   | 364.0                   |
| F000'                  | 363.43                  |                         |
| h, k, l <sub>max</sub> | 8, 15, 10               | 8, 15, 10               |
| Nref                   | 1473                    | 1459                    |
| Tmin, Tmax             | 0.743, 0.764            | 0.388, 0.754            |
| Tmin'                  | 0.674                   |                         |

```
Correction method= # Reported T Limits: Tmin=0.388 Tmax=0.754
AbsCorr = MULTI-SCAN
```

Data completeness= 0.990                      Theta (max)= 72.785

```
R(reflections)= 0.0821( 1188)      wR2(reflections)=
S = 1.086                        0.2443( 1459)
Npar= 110
```

---

The following ALERTS were generated. Each ALERT has the format

**test-name\_ALERT\_alert-type\_alert-level.**

Click on the hyperlinks for more details of the test.

---

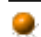

#### Alert level B

PLAT094\_ALERT\_2\_B Ratio of Maximum / Minimum Residual Density .... 4.32 Report

**Author Response: Twinned structure.**

PLAT097\_ALERT\_2\_B Large Reported Max. (Positive) Residual Density 3.52 eA-3

**Author Response: See above.**

---

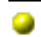

#### Alert level C

DIFMX02\_ALERT\_1\_C The maximum difference density is > 0.1\*ZMAX\*0.75

The relevant atom site should be identified.

PLAT042\_ALERT\_1\_C Calc. and Reported MoietyFormula Strings Differ Please Check

Calc: C8 H7 N O4, C6 H4 N2 Se

Rep.: C6 H4 N2 Se, C8 H7 N O4

PLAT341\_ALERT\_3\_C Low Bond Precision on C-C Bonds ..... 0.0075 Ang.

PLAT906\_ALERT\_3\_C Large K Value in the Analysis of Variance ..... 2.500 Check

PLAT911\_ALERT\_3\_C Missing FCF Refl Between Thmin & STh/L= 0.600 7 Report

2 0 0, 2 1 0, 0 2 0, -2 0 1, -1 3 1, 0 0 2,  
5 0 6,

---

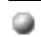

#### Alert level G

PLAT007\_ALERT\_5\_G Number of Unrefined Donor-H Atoms ..... 3 Report

H1 H2A H2B

PLAT012\_ALERT\_1\_G N.O.K. \_shelx\_res\_checksum Found in CIF ..... Please Check

PLAT072\_ALERT\_2\_G SHELXL First Parameter in WGHT Unusually Large 0.18 Report

PLAT299\_ALERT\_4\_G Atom Site Occupancy Constrained at ..... 0.5 Check

H2A H2B

PLAT480\_ALERT\_4\_G Long H...A H-Bond Reported H3 ..O2 . 2.75 Ang.

PLAT779\_ALERT\_4\_G Suspect or Irrelevant (Bond) Angle(s) in CIF ... 36.30 Deg.

H2A -N2 -H2B 1\_555 1\_555 4\_575 ..... #

5 Check

PLAT779\_ALERT\_4\_G Suspect or Irrelevant (Bond) Angle(s) in CIF ... 36.30 Deg.

H2B -N2 -H2A 1\_555 1\_555 4\_575 ..... #

8 Check

PLAT870\_ALERT\_4\_G ALERTS Related to Twinning Effects Suppressed .. ! Info

PLAT910\_ALERT\_3\_G Missing # of FCF Reflection(s) Below Theta(Min). 2 Note

0 0 1, 0 1 1,

PLAT912\_ALERT\_4\_G Missing # of FCF Reflections Above STh/L= 0.600 5 Note

PLAT913\_ALERT\_3\_G Missing # of Very Strong Reflections in FCF .... 2 Note

2 0 0, -2 0 1,

PLAT931\_ALERT\_5\_G CIFcalcFCF Twin Law [ 1 0 4] Est.d BASF 0.28 Check

PLAT941\_ALERT\_3\_G Average HKL Measurement Multiplicity ..... 1.0 Low

PLAT969\_ALERT\_5\_G The 'Henn et al.' R-Factor-gap value ..... 3.472 Note

Predicted wR2: Based on SigI\*\*2 7.04 or SHELX Weight 22.50

---

0 **ALERT level A** = Most likely a serious problem - resolve or explain  
2 **ALERT level B** = A potentially serious problem, consider carefully  
5 **ALERT level C** = Check. Ensure it is not caused by an omission or oversight  
14 **ALERT level G** = General information/check it is not something unexpected

3 ALERT type 1 CIF construction/syntax error, inconsistent or missing data  
3 ALERT type 2 Indicator that the structure model may be wrong or deficient  
6 ALERT type 3 Indicator that the structure quality may be low  
6 ALERT type 4 Improvement, methodology, query or suggestion  
3 ALERT type 5 Informative message, check

---

It is advisable to attempt to resolve as many as possible of the alerts in all categories. Often the minor alerts point to easily fixed oversights, errors and omissions in your CIF or refinement strategy, so attention to these fine details can be worthwhile. In order to resolve some of the more serious problems it may be necessary to carry out additional measurements or structure refinements. However, the purpose of your study may justify the reported deviations and the more serious of these should normally be commented upon in the discussion or experimental section of a paper or in the "special\_details" fields of the CIF. checkCIF was carefully designed to identify outliers and unusual parameters, but every test has its limitations and alerts that are not important in a particular case may appear. Conversely, the absence of alerts does not guarantee there are no aspects of the results needing attention. It is up to the individual to critically assess their own results and, if necessary, seek expert advice.

### **Publication of your CIF in IUCr journals**

A basic structural check has been run on your CIF. These basic checks will be run on all CIFs submitted for publication in IUCr journals (*Acta Crystallographica*, *Journal of Applied Crystallography*, *Journal of Synchrotron Radiation*); however, if you intend to submit to *Acta Crystallographica Section C* or *E* or *IUCrData*, you should make sure that full publication checks are run on the final version of your CIF prior to submission.

### **Publication of your CIF in other journals**

Please refer to the *Notes for Authors* of the relevant journal for any special instructions relating to CIF submission.

---

**PLATON version of 02/02/2025; check.def file version of 02/02/2025**

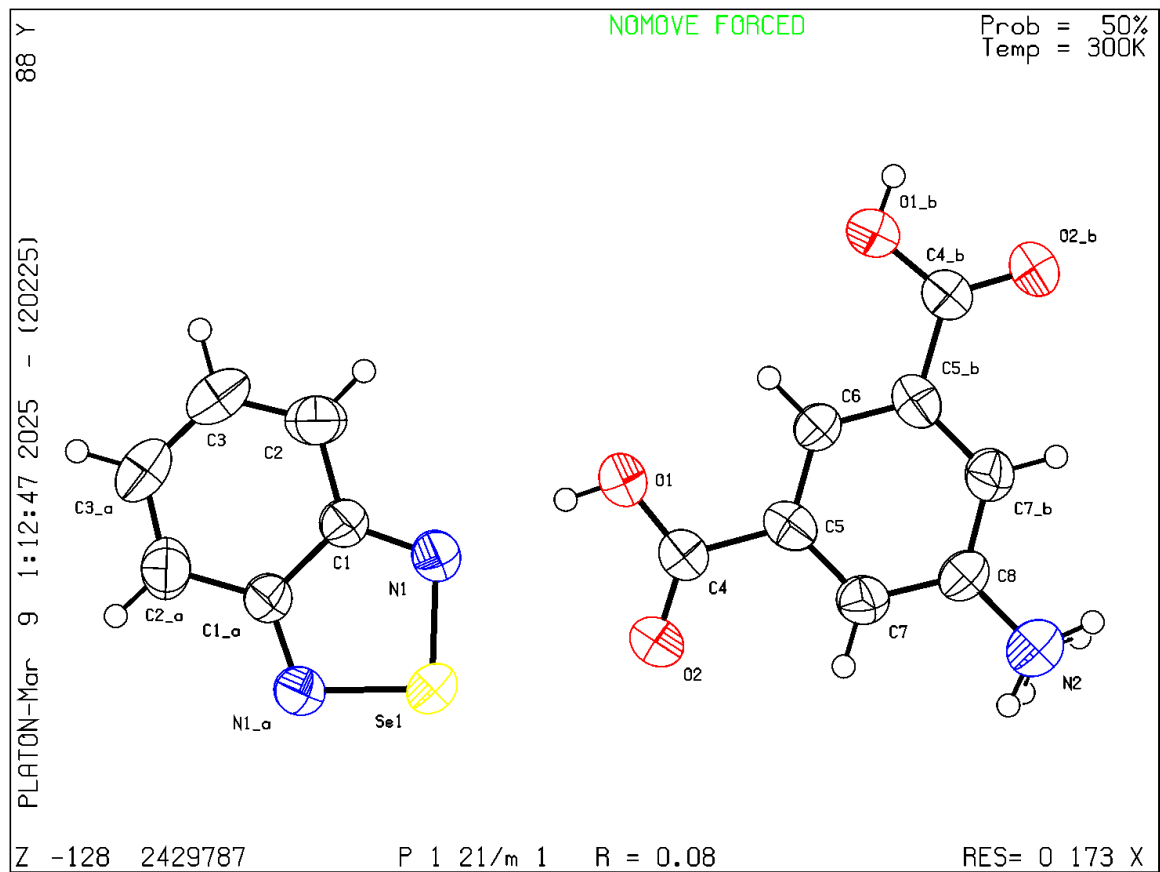

## checkCIF/PLATON report

Structure factors have been supplied for datablock(s) 2429788\_auto

THIS REPORT IS FOR GUIDANCE ONLY. IF USED AS PART OF A REVIEW PROCEDURE FOR PUBLICATION, IT SHOULD NOT REPLACE THE EXPERTISE OF AN EXPERIENCED CRYSTALLOGRAPHIC REFEREE.

No syntax errors found.      CIF dictionary      Interpreting this report

### Datablock: 2429788\_auto

---

|                        |                             |                                                               |
|------------------------|-----------------------------|---------------------------------------------------------------|
| Bond precision:        | C-C = 0.0054 Å              | Wavelength=0.71073                                            |
| Cell:                  | a=3.8992 (1)<br>alpha=90    | b=37.6399 (13)<br>beta=95.702 (3)<br>c=7.7471 (2)<br>gamma=90 |
| Temperature:           | 293 K                       |                                                               |
|                        | Calculated                  | Reported                                                      |
| Volume                 | 1131.38 (6)                 | 1131.38 (6)                                                   |
| Space group            | P 21/m                      | P 1 21/m 1                                                    |
| Hall group             | -P 2yb                      | -P 2yb                                                        |
| Moiety formula         | 2(C8 H5 Br O4), C6 H4 N2 Se | C8 H5 Br O4, C3 H2 N Se0.5                                    |
| Sum formula            | C22 H14 Br2 N2 O8 Se        | C11 H6 Br N O4 Se0.50                                         |
| Mr                     | 673.11                      | 335.56                                                        |
| Dx, g cm <sup>-3</sup> | 1.976                       | 1.970                                                         |
| Z                      | 2                           | 4                                                             |
| Mu (mm <sup>-1</sup> ) | 5.245                       | 5.245                                                         |
| F000                   | 656.0                       | 652.0                                                         |
| F000'                  | 655.04                      |                                                               |
| h,k,lmax               | 5,51,10                     | 5,50,10                                                       |
| Nref                   | 3108                        | 2827                                                          |
| Tmin,Tmax              | 0.277,0.410                 | 0.650,1.000                                                   |
| Tmin'                  | 0.199                       |                                                               |

Correction method= # Reported T Limits: Tmin=0.650 Tmax=1.000  
AbsCorr = MULTI-SCAN

Data completeness= 0.910      Theta(max)= 29.130

|                                |                                  |
|--------------------------------|----------------------------------|
| R(reflections)= 0.0468 ( 2139) | wR2(reflections)= 0.1024 ( 2827) |
| S = 1.059                      | Npar= 165                        |



The following ALERTS were generated. Each ALERT has the format

**test-name\_ALERT\_alert-type\_alert-level.**

Click on the hyperlinks for more details of the test.

### Alert level C

|                   |                                                  |                |              |
|-------------------|--------------------------------------------------|----------------|--------------|
| PLAT041_ALERT_1_C | Calc. and Reported SumFormula                    | Strings Differ | Please Check |
|                   | Calc: C22 H14 Br2 N2 O8 Se                       |                |              |
|                   | Rep.: C11 H6 Br N O4 Se0.50                      |                |              |
| PLAT042_ALERT_1_C | Calc. and Reported MoietyFormula                 | Strings Differ | Please Check |
|                   | Calc: 2(C8 H5 Br O4), C6 H4 N2 Se                |                |              |
|                   | Rep.: C8 H5 Br O4, C3 H2 N Se0.5                 |                |              |
| PLAT043_ALERT_1_C | Calculated and Reported Mol. Weight Differ by .. |                | 1.99 Check   |
| PLAT068_ALERT_1_C | Reported F000 Differs from Calcd (or Missing)... |                | Please Check |
| PLAT250_ALERT_2_C | Large U3/U1 Ratio for <U(i,j)> Tensor(Resd 1)    |                | 2.2 Note     |
| PLAT906_ALERT_3_C | Large K Value in the Analysis of Variance .....  |                | 6.864 Check  |
| PLAT910_ALERT_3_C | Missing # of FCF Reflection(s) Below Theta(Min). |                | 7 Note       |
|                   | 0 2 0, 0 4 0, 0 6 0, 0 0 1, 0 1 1, 0 2 1,        |                |              |
|                   | 0 3 1,                                           |                |              |

### Alert level G

FORMU01\_ALERT\_1\_G There is a discrepancy between the atom counts in the  
 \_chemical\_formula\_sum and \_chemical\_formula\_moiety. This is  
 usually due to the moiety formula being in the wrong format.  
 Atom count from \_chemical\_formula\_sum: C11 H6 Br1 N1 O4 Se0.5  
 Atom count from \_chemical\_formula\_moiety: C11 H7 Br1 N1 O4 Se0.5

FORMU01\_ALERT\_2\_G There is a discrepancy between the atom counts in the  
 \_chemical\_formula\_sum and the formula from the \_atom\_site\* data.  
 Atom count from \_chemical\_formula\_sum: C11 H6 Br1 N1 O4 Se0.5  
 Atom count from the \_atom\_site data: C11 H7 Br1 N1 O4 Se0.5

CELLZ01\_ALERT\_1\_G Difference between formula and atom\_site contents detected.

CELLZ01\_ALERT\_1\_G ALERT: Large difference may be due to a  
 symmetry error - see SYMMG tests  
 From the CIF: \_cell\_formula\_units\_Z 4  
 From the CIF: \_chemical\_formula\_sum C11 H6 Br N O4 Se0.5  
 TEST: Compare cell contents of formula and atom\_site data

| atom | Z*formula | cif sites | diff  |
|------|-----------|-----------|-------|
| C    | 44.00     | 44.00     | 0.00  |
| H    | 24.00     | 28.00     | -4.00 |
| Br   | 4.00      | 4.00      | 0.00  |
| N    | 4.00      | 4.00      | 0.00  |
| O    | 16.00     | 16.00     | 0.00  |
| Se   | 2.00      | 2.00      | 0.00  |

PLAT007\_ALERT\_5\_G Number of Unrefined Donor-H Atoms ..... 1 Report  
 H2

PLAT012\_ALERT\_1\_G No \_shelx\_res\_checksum Found in CIF ..... Please Check

PLAT045\_ALERT\_1\_G Calculated and Reported Z Differ by a Factor ... 0.500 Check

PLAT199\_ALERT\_1\_G Reported \_cell\_measurement\_temperature ..... (K) 293 Check

PLAT200\_ALERT\_1\_G Reported \_diffrn\_ambient\_temperature ..... (K) 293 Check

PLAT790\_ALERT\_4\_G Centre of Gravity not Within Unit Cell: Resd. # 2 Note  
 C6 H4 N2 Se

PLAT912\_ALERT\_4\_G Missing # of FCF Reflections Above STh/L= 0.600 274 Note

PLAT969\_ALERT\_5\_G The 'Henn et al.' R-Factor-gap value ..... 4.058 Note  
 Predicted wR2: Based on SigI\*\*2 2.52 or SHELX Weight 9.67

---

```

0 ALERT level A = Most likely a serious problem - resolve or explain
0 ALERT level B = A potentially serious problem, consider carefully
7 ALERT level C = Check. Ensure it is not caused by an omission or oversight
13 ALERT level G = General information/check it is not something unexpected

11 ALERT type 1 CIF construction/syntax error, inconsistent or missing data
3 ALERT type 2 Indicator that the structure model may be wrong or deficient
2 ALERT type 3 Indicator that the structure quality may be low
2 ALERT type 4 Improvement, methodology, query or suggestion
2 ALERT type 5 Informative message, check

```

---



---

It is advisable to attempt to resolve as many as possible of the alerts in all categories. Often the minor alerts point to easily fixed oversights, errors and omissions in your CIF or refinement strategy, so attention to these fine details can be worthwhile. In order to resolve some of the more serious problems it may be necessary to carry out additional measurements or structure refinements. However, the purpose of your study may justify the reported deviations and the more serious of these should normally be commented upon in the discussion or experimental section of a paper or in the "special\_details" fields of the CIF. checkCIF was carefully designed to identify outliers and unusual parameters, but every test has its limitations and alerts that are not important in a particular case may appear. Conversely, the absence of alerts does not guarantee there are no aspects of the results needing attention. It is up to the individual to critically assess their own results and, if necessary, seek expert advice.

### Publication of your CIF in IUCr journals

A basic structural check has been run on your CIF. These basic checks will be run on all CIFs submitted for publication in IUCr journals (*Acta Crystallographica*, *Journal of Applied Crystallography*, *Journal of Synchrotron Radiation*); however, if you intend to submit to *Acta Crystallographica Section C* or *E* or *IUCrData*, you should make sure that full publication checks are run on the final version of your CIF prior to submission.

### Publication of your CIF in other journals

Please refer to the *Notes for Authors* of the relevant journal for any special instructions relating to CIF submission.

---

**PLATON version of 02/02/2025; check.def file version of 02/02/2025**

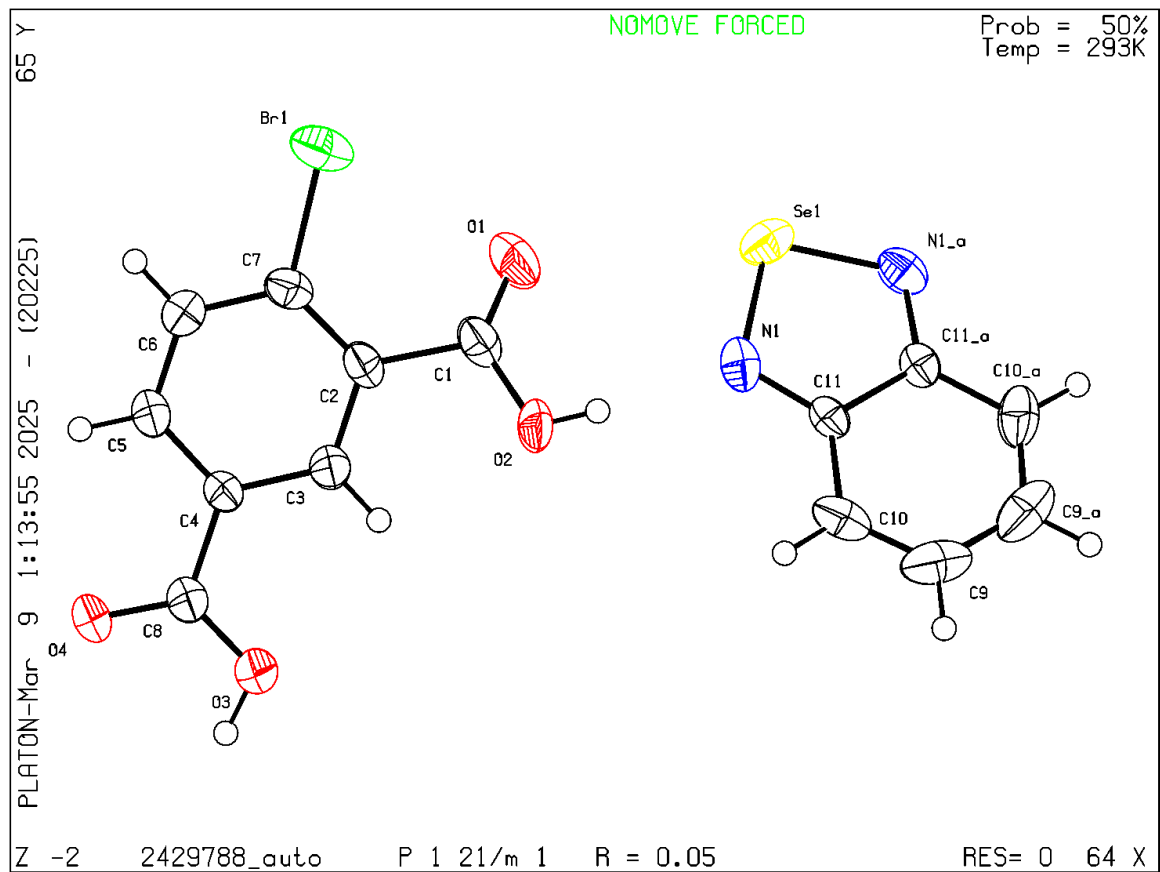

## checkCIF/PLATON report

Structure factors have been supplied for datablock(s) 2429789

THIS REPORT IS FOR GUIDANCE ONLY. IF USED AS PART OF A REVIEW PROCEDURE FOR PUBLICATION, IT SHOULD NOT REPLACE THE EXPERTISE OF AN EXPERIENCED CRYSTALLOGRAPHIC REFEREE.

No syntax errors found.      CIF dictionary      Interpreting this report

### Datablock: 2429789

---

|                        |                           |                                                             |
|------------------------|---------------------------|-------------------------------------------------------------|
| Bond precision:        | C-C = 0.0051 Å            | Wavelength=0.71073                                          |
| Cell:                  | a=3.8144 (11)<br>alpha=90 | b=22.357 (7)<br>beta=93.581 (9)<br>c=15.964 (5)<br>gamma=90 |
| Temperature:           | 300 K                     |                                                             |
|                        | Calculated                | Reported                                                    |
| Volume                 | 1358.7 (7)                | 1358.7 (7)                                                  |
| Space group            | P 21/c                    | P 1 21/c 1                                                  |
| Hall group             | -P 2ybc                   | -P 2ybc                                                     |
| Moiety formula         | C6 H4 O4 S, C6 H4 N2 Se   | C6 H4 N2 Se, C6 H4 O4 S                                     |
| Sum formula            | C12 H8 N2 O4 S Se         | C12 H8 N2 O4 S Se                                           |
| Mr                     | 355.22                    | 355.22                                                      |
| Dx, g cm <sup>-3</sup> | 1.737                     | 1.737                                                       |
| Z                      | 4                         | 4                                                           |
| Mu (mm <sup>-1</sup> ) | 2.931                     | 2.931                                                       |
| F000                   | 704.0                     | 704.0                                                       |
| F000'                  | 704.43                    |                                                             |
| h,k,lmax               | 4,29,20                   | 4,29,20                                                     |
| Nref                   | 3094                      | 3070                                                        |
| Tmin,Tmax              | 0.596,0.683               | 0.559,0.746                                                 |
| Tmin'                  | 0.584                     |                                                             |

Correction method= # Reported T Limits: Tmin=0.559 Tmax=0.746  
AbsCorr = MULTI-SCAN

Data completeness= 0.992      Theta(max)= 27.485

|                               |                                 |
|-------------------------------|---------------------------------|
| R(reflections)= 0.0441( 2387) | wR2(reflections)= 0.0791( 3070) |
| S = 1.106                     | Npar= 189                       |

---

The following ALERTS were generated. Each ALERT has the format

**test-name\_ALERT\_alert-type\_alert-level.**

Click on the hyperlinks for more details of the test.

---

#### **Alert level A**

PLAT430\_ALERT\_2\_A Short Inter D...A Contact Sel ..O2 . 2.89 Ang.  
x,y,z = 1\_555 Check

**Author Response: It is a chalcogen bond which can not be recognized by the software.**

---

#### **Alert level C**

PLAT042\_ALERT\_1\_C Calc. and Reported MoietyFormula Strings Differ Please Check  
Calc: C6 H4 O4 S, C6 H4 N2 Se  
Rep.: C6 H4 N2 Se, C6 H4 O4 S  
PLAT354\_ALERT\_3\_C Short O-H (X0.82,N0.98A) O1 - H1 . 0.71 Ang.  
PLAT601\_ALERT\_2\_C Unit Cell Contains Solvent Accessible VOIDS <= 35 Ang\*\*3  
PLAT906\_ALERT\_3\_C Large K Value in the Analysis of Variance ..... 5.049 Check  
PLAT911\_ALERT\_3\_C Missing FCF Refl Between Thmin & STh/L= 0.600 7 Report  
1 0 0, 1 1 0, 1 0 2, 0 1 2, 1 1 2, 2 1 2,  
0 2 2,  
PLAT977\_ALERT\_2\_C Check Negative Difference Density on H4 . -0.46 eA-3

---

#### **Alert level G**

PLAT012\_ALERT\_1\_G N.O.K. \_shelx\_res\_checksum Found in CIF ..... Please Check  
PLAT910\_ALERT\_3\_G Missing # of FCF Reflection(s) Below Theta(Min). 3 Note  
0 2 0, 0 1 1, 0 2 1,  
PLAT912\_ALERT\_4\_G Missing # of FCF Reflections Above STh/L= 0.600 13 Note  
PLAT913\_ALERT\_3\_G Missing # of Very Strong Reflections in FCF .... 1 Note  
1 1 2,  
PLAT933\_ALERT\_2\_G Number of HKL-OMIT Records in Embedded .res File 1 Note  
0 1 2,  
PLAT954\_ALERT\_1\_G Reported (CIF) and Actual (FCF) Kmax Differ by . 1 Units  
PLAT969\_ALERT\_5\_G The 'Henn et al.' R-Factor-gap value ..... 2.579 Note  
Predicted wR2: Based on SigI\*\*2 3.06 or SHELX Weight 7.15  
PLAT978\_ALERT\_2\_G Number C-C Bonds with Positive Residual Density. 4 Info

---

- 1 **ALERT level A** = Most likely a serious problem - resolve or explain  
0 **ALERT level B** = A potentially serious problem, consider carefully  
6 **ALERT level C** = Check. Ensure it is not caused by an omission or oversight  
8 **ALERT level G** = General information/check it is not something unexpected

- 3 ALERT type 1 CIF construction/syntax error, inconsistent or missing data  
5 ALERT type 2 Indicator that the structure model may be wrong or deficient  
5 ALERT type 3 Indicator that the structure quality may be low  
1 ALERT type 4 Improvement, methodology, query or suggestion  
1 ALERT type 5 Informative message, check
-

It is advisable to attempt to resolve as many as possible of the alerts in all categories. Often the minor alerts point to easily fixed oversights, errors and omissions in your CIF or refinement strategy, so attention to these fine details can be worthwhile. In order to resolve some of the more serious problems it may be necessary to carry out additional measurements or structure refinements. However, the purpose of your study may justify the reported deviations and the more serious of these should normally be commented upon in the discussion or experimental section of a paper or in the "special\_details" fields of the CIF. checkCIF was carefully designed to identify outliers and unusual parameters, but every test has its limitations and alerts that are not important in a particular case may appear. Conversely, the absence of alerts does not guarantee there are no aspects of the results needing attention. It is up to the individual to critically assess their own results and, if necessary, seek expert advice.

### **Publication of your CIF in IUCr journals**

A basic structural check has been run on your CIF. These basic checks will be run on all CIFs submitted for publication in IUCr journals (*Acta Crystallographica*, *Journal of Applied Crystallography*, *Journal of Synchrotron Radiation*); however, if you intend to submit to *Acta Crystallographica Section C* or *E* or *IUCrData*, you should make sure that full publication checks are run on the final version of your CIF prior to submission.

### **Publication of your CIF in other journals**

Please refer to the *Notes for Authors* of the relevant journal for any special instructions relating to CIF submission.

---

**PLATON version of 02/02/2025; check.def file version of 02/02/2025**

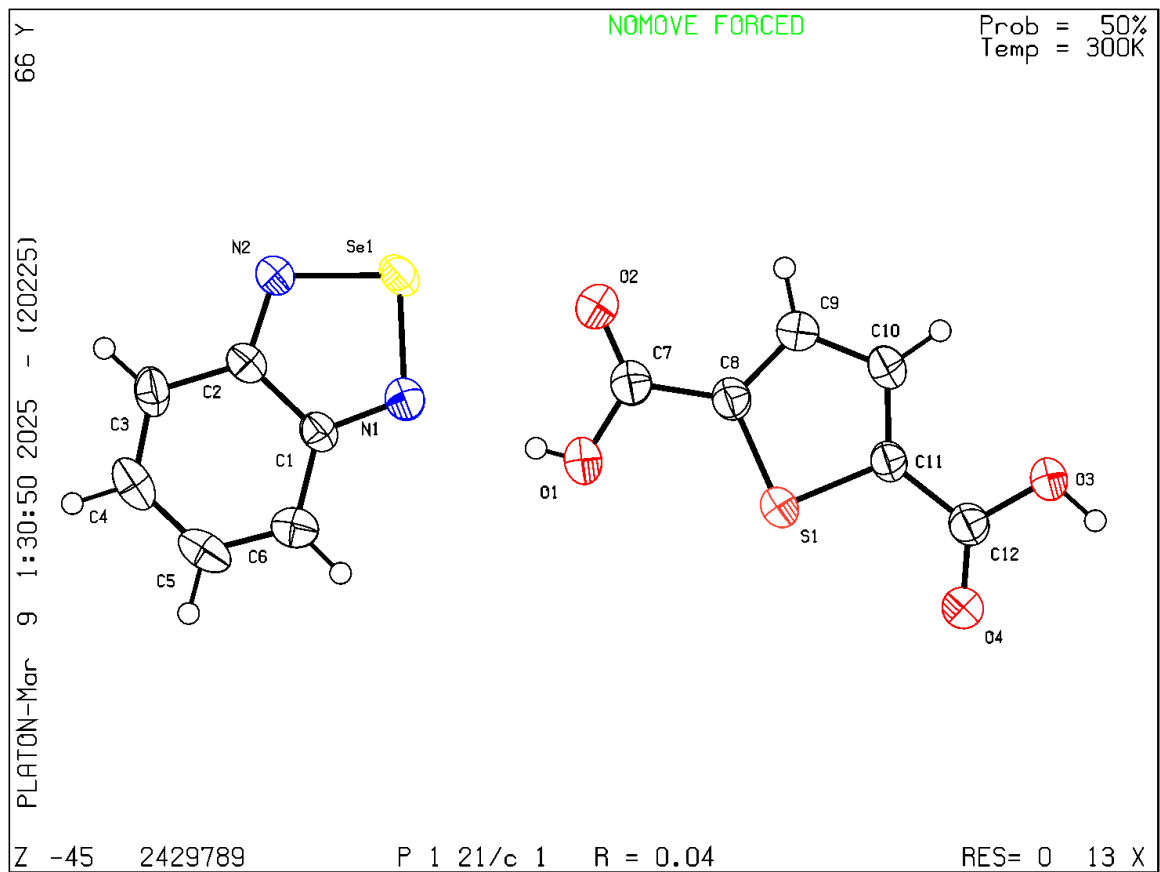

Supplement: d5ce00262a1.pdf [file d5ce00262a1.pdf]
